**Title:**

*Giardia's* ventral disc is hyperstable and composed of over 80 disc-associated proteins

**Authors:**

Nosala, C., Hagen, K.D., Jones, K. Loudermilk, R., Nguyen, K., and S.C. Dawson

**Address:**

Department of Microbiology and Molecular Genetics

One Shields Avenue

University of California Davis

Davis, CA 95616

530-752-3633

scdawson@ucdavis.edu

1 **Abstract**

2 *Giardia* is a common protistan parasite that causes diarrheal disease worldwide. Motile  
3 trophozoites colonize the small intestine, attaching to the villi with the ventral disc, a complex  
4 microtubule (MT) organelle. Attachment is required for infection as it allows *Giardia* to resist  
5 peristalsis. Parallel, uniformly spaced MTs spiral to form a domed structure, with one overlap  
6 zone between the upper and lower portions, and the ventral groove region extending over the  
7 ventral flagella. The MT spiral is coated with novel microribbon-crossbridge protein complexes  
8 (MR-CB) that extend up to 400 nm into the cytoplasm. The highly ordered lateral crest lies outside  
9 the disc margin at the disc periphery and forms a seal in early staged of parasite attachment. The  
10 disc is a hyperstable structure in that drugs that normally affect MT dynamic instability have no  
11 effect on ventral disc microtubules and no turnover of any disc-associated protein has been  
12 reported. Here we show that much of the ventral disc structure remains intact after detergent  
13 extraction in up to 2M potassium chloride. Using a new method of disc biochemical fractionation  
14 in high salt with shot-gun proteomic analysis of the disc, we identified and confirmed 55 new  
15 disc-associated protein (DAPs), bringing the current total of DAPs to 87. While close to 30 DAPs  
16 also localize with flagella, 54 DAPs localize specifically to the disc. Most also localize to specific  
17 structural regions of the disc such as the ventral groove or disc margin. Despite our developing  
18 understanding of the complexity of ventral disc architecture, we are still in the very preliminary  
19 stages of understanding the and composition and contribution of specific structural elements in  
20 generating the forces for attachment and stability. Future genetic, biochemical, and functional  
21 analyses of DAPs will be central toward understanding not only disc architecture and assembly,  
22 but also the overall disc conformational dynamics that promote host attachment.

## 1 Introduction

2 Microtubules (MTs) in protists can assemble into cytoskeletal arrays that adopt shapes, functions,  
3 or regulatory mechanisms that are not seen in other organisms. The ubiquity and diversity of  
4 unique cytoskeletal organelles in microbial eukaryotes underscores the fact that cytoskeletal  
5 variation is the norm rather than the exception. Emerging microbial eukaryotic model systems  
6 offer a wealth cytoskeletal organelles and associated proteins [1]. Diverse protistan cytoskeletal  
7 structures are often composed of proteins that lack homology to proteins in other eukaryotes [2-  
8 4], and thus may be an untapped reservoir of non-canonical MT-binding proteins governing MT  
9 assembly, nucleation, or dynamics [5]. The MT based apical complex of the apicomplexan  
10 parasite *T. gondii*, for example, acts as an invasion machine to infect of host cells and is  
11 constructed from canonical tubulins, non-canonical tubulins, and novel proteins [2, 6].

12 *Giardia* is the causative agent of giardiasis; a diarrheal disease affecting human health and  
13 livestock worldwide [7]. Commonly ingested from contaminated water sources, *Giardia* cysts  
14 excyst into flagellated trophozoites in the proximal small intestine where they attach to the  
15 intestinal microvilli and proliferate [8]. *Giardia* has no known secreted toxins and the cause of  
16 diarrhea is not well understood. Attachment occurs rapidly and is a necessary process for  
17 infection as it allows the parasite to resist peristalsis and remain in the gut. The ventral disc is a  
18 highly ordered and complex spiral microtubule (MT) array [9-14]. Parallel, uniformly spaced MTs  
19 spiral approximately one and a quarter turns into a domed structure. The disc spiral array has  
20 one region of overlap, termed the overlap zone, between the upper and lower portions of the  
21 disc. The majority of ventral disc microtubules terminate with their plus ends either on the

1 periphery of the disc or in the overlap zone, with a small subset observed to terminate within the  
2 disc body itself (Figure 1)

3           Despite our developing understanding of the complexity of ventral disc architecture (REF),  
4 we are still in the very preliminary stages of understanding the and composition and contribution  
5 of specific structural elements in generating the forces for attachment and stability. The overall  
6 architecture of the disc was first described by Cheissin over 50 years ago [15], and the first 3D  
7 high-resolution architecture of the ventral disc was obtained recently using cryo-electron  
8 tomography (cryo-ET) [16]. Cryo-ET of whole isolated ventral discs with volume averaging of  
9 repetitive structural elements provided details of the cytoskeletal architecture and revealed  
10 dense protein complexes coating nearly all protofilaments of the microtubule spiral array  
11 (FIGURE 1). In sum, the entire disc contains more than 1.2 mm of tubulin forming roughly one  
12 hundred MTs that vary in length from 2 to 18  $\mu\text{m}$  [17].

13 In a recent proteomic analysis of detergent-extracted, isolated ventral discs, over twenty new  
14 candidate DAPs were identified that specifically localize to regions of the ventral disc or lateral  
15 crest [4].

16           Associated with the entire length of the MT spiral are unique substructural elements –  
17 the trilaminar microribbons – that are found throughout the disc body and extend 150-400 nm  
18 dorsally into the cytoplasm [12, 13] (see FIGURE 1). The microribbons consist of two sheets of  
19 globular subunits, separated by a fibrous inner core, forming a structure about 25 nm thick [13].  
20 Regularly spaced crossbridge structures link adjacent microribbons [12] (see FIGURE 2). In the  
21 early 1980's, Holberton successfully fractionated and identified low-molecular weight

1 microribbon proteins that he termed giardins [12, 13]. Like microtubules, fractionated giardins  
2 can polymerize in solution. Microribbon polymers do not resemble canonical microtubules but  
3 they can form sheets, tactoids, and ribbons. The contribution of the microribbons to ventral disc  
4 stability, conformational dynamics, or to attachment is also unknown.

5 Along with previously identified substructures (e.g., microribbons and crossbridges), this study  
6 also defined several new repetitive MT-associated substructures including: three *Giardia* MT-  
7 associated proteins (gMAPs 1-3) and three MT inner proteins (gMIPS 5, 7 and 8), each associated  
8 with specific protofilaments, as well as two other substructures termed sidearms and paddles.  
9 Repeating every 8 nm, the sidearms and paddles are spaced at the distance of a single alpha/beta  
10 tubulin dimer. Crossbridges repeat every 16 nm corresponding to the distance of two alpha/beta  
11 tubulin dimers (FIGURE 1). Additional structural elements are associated with the ventral disc  
12 (FIGURE 1). These include a highly ordered structure, the lateral crest, which surrounds the  
13 periphery of the ventral disc [18] and is proposed to have contractile functions

14 The disc is a “hyperstable” structure in that drugs that normally affect MT dynamic instability  
15 have no effect on ventral disc microtubules [19] and no turnover of any disc-associated protein  
16 has been reported [4]. MTs of the ventral display canonical 13-protofilament tubular structure  
17 yet dynamic instability has not been observed of vdMTs and no turnover of disc associated  
18 proteins (DAPs) has been observed [4, 19]. The large number of unique microtubule associated  
19 proteins and other associated structural elements decorating the disc spiral may contribute to  
20 the observed hyperstability. The apparent hyperstability of the ventral disc is likely explained by  
21 the high degree of protein decoration around the ventral disc microtubules and suggests a

1 possible function for both the microribbon and crossbridge structures. Several microribbon  
2 proteins have been identified and are observed to form non-MT like polymers in solution in vitro  
3 [10, 13]. Ventral disc crossbridges join together lateral microribbons and repeat every 16nm  
4 throughout the entire ventral disc body. To date, no crossbridge associated proteins have been  
5 identified, and the structure of the crossbridges has proven troublesome to define [16, 17].  
6 These structures have been hypothesized to be contractile and vary in length, which could explain  
7 why the crossbridges are not evident via cryoET [11]

8 Here we further define the extent to disc structural stability and extend the number of  
9 DAPs to 87. Over 33 DAPs lack any homology to proteins in other eukaryotes and close to thirty  
10 DAPs simply contain ankyrin repeat domains. Disc-associated ankyrin repeat proteins may  
11 contribute to disc assembly or architecture, as ankyrin repeat proteins are known to mediate  
12 protein-protein interactions, protein folding, and protein stability [20]. The composition and  
13 function of prominent substructural elements like the crossbridges, sidearms, and paddles is also  
14 unknown. Further dissection of the mechanism of disc conformational dynamics will first require  
15 an understanding of the functional roles of these unique disc substructural elements.

16

## 17 **Materials and Methods**

### 18 ***Giardia* culture and live imaging conditions**

19 All *G. lamblia* (ATCC 50803) strains were maintained in modified TYI-S-33 medium supplemented  
20 with bovine bile and 5% adult and 5% fetal bovine serum [56] in sterile 16 ml screw-capped  
21 disposable tubes (BD Falcon), and incubated upright at 37°C without shaking. GFP-tagging vectors

1 were introduced into WBC6 by electroporation (roughly 20 µg DNA) as previously described [4].  
2 Strains were maintained with antibiotic selection (50 µg/ml puromycin [4]. All strains were  
3 thawed from frozen stocks and cultured for 24 to 48 hours prior to live imaging. Prior to live  
4 imaging, trophozoites were washed three times with warmed 1X HBS to decrease  
5 autofluorescence associated with the culture medium.

6

### 7 **C-terminal GFP tagging of candidate disc-associated proteins**

8 All strains were constructed as previously described (Hagen et al 2011). For C-terminal GFP  
9 episomal tag: All candidate DAP PCR forward primers were designed to bind 200 bp upstream of  
10 the gene to include the Giardia native promoter and contained the sequence CACC at the 5' end  
11 to facilitate directional cloning. Blunt-ended PCR amplicons were generated by PCR using  
12 PfuTurbo Hotstart PCR Mastermix (Stratagene) with Giardia intestinalis strain WBC6 genomic  
13 DNA. The candidate DAP PCR amplicons were subsequently subcloned into the Invitrogen  
14 pENTR/D-TOPO backbone to generate Gateway entry clones. Inserts in entry clones were  
15 sequenced to confirm the identity and correct orientation of the gene. To construct DAP-GFP  
16 fusions, positive entry clones were then recombined, via LR reaction, with a 1-fragment GFP  
17 tagging E. coli/Giardia shuttle destination vector (pcGFP1F.pac) using LR Clonase II Plus  
18 (Invitrogen). LR reactions were performed using 100 ng pcGFP1F.pac and 150 ng of DAP entry  
19 clone plasmid DNA. Positive clones were screened by digestion with *Ascl*, and bulk plasmid DNA  
20 was prepared using Qiagen's Plasmid Midi Kit. To create C-terminal GFP-tagged candidate DAP  
21 strains, Giardia intestinalis strain WBC6 was electroporated with roughly 20 mg of plasmid DNA

1 (above) using the GenePulserXL (BioRad) under previously described conditions. Episomal DAP-  
2 GFP constructs were maintained in transformants using antibiotic selection (50 mg/ml  
3 puromycin).

4 To confirm the cellular localization of novel differentially expressed genes identified in the *in vivo*  
5 transcriptome, 55 differentially expressed *Giardia* genes were GFP-tagged via our laboratory's  
6 Gateway cloning pipeline [21]. We also tagged fourteen genes that were more highly expressed  
7 in *in vitro* culture. The C-terminal GFP fusion constructs included approximately 200–250  
8 nucleotides upstream of the gene, the gene itself in frame with GFP, and a puromycin resistance  
9 cassette [21]. The *Giardia* strain WBC6 was electroporated with 20 µg of GFP-fusion plasmids,  
10 and transformed strains were maintained under antibiotic selection (50 µg/ml puromycin) for at  
11 least two weeks [21].

## 12 **Biochemical fractionation of the *Giardia* cytoskeleton**

13 Detergent extraction of *Giardia*'s microtubule cytoskeleton was done as previously described  
14 (Hagen et al. 2012). First, TYI-S-33 medium was decanted from one confluent 12 ml culture of  
15 trophozoites, cells were washed three times with warm 1X HBS. Cells were iced for 15 minutes  
16 in the last HBS wash, pelleted, and resuspended in 1x PHEM (60 mM PIPES, 25 mM HEPES, 10  
17 mM EGTA, 1 mM MgCl<sub>2</sub>, pH 7.4) containing 1% Triton X-100 and 1M KCl to demembranate. This  
18 solution was transferred to an Eppendorf tube and vortexed continuously at a medium setting  
19 for 30 minutes. To prevent proteolysis, protease inhibitors (Roche) were added to the  
20 preparation. Ventral disc cytoskeletons were then pelleted by centrifugation at 1000×g for 5



1 minutes, and the pellets were washed two times in 1X PHEM lacking 1% Triton X-100. Sufficient  
2 extraction of cytoskeletons was confirmed by wet mount using DIC microscopy.

3 Cytoskeletons were fractionated as previously described (Holberton 1981, 1983, etc.) First, an  
4 aliquot of cytoskeletons in PHEM was retained as 'fraction 1.' Cytoskeletons were then pelleted,  
5 washed, and resuspended in CB buffer (10mM Tris, 1mM EDTA, pH 7.7) for 48 hours to dissolve  
6 the crossbridges. The leftover complexes were pelleted at 1000xG for 5 mins and the  
7 supernatant was retained as 'fraction 2.' Cytoskeletal complexes were washed and resuspended  
8 in MR buffer (10mM HEPES, 5mM EDTA, pH 8.7) for 48 hours to dissolve microribbons. The  
9 remaining tubulin complexes were pelleted and the supernatant was retained as 'fraction 3.'  
10 Tubulin leftovers were resuspended in 1x PHEM and retained as 'fraction 4.'

### 11 **Proteomic analyses of fractions and mass spectrometry**

12 All MS/MS samples were analyzed using X! Tandem (The GPM, [thegpm.org](http://thegpm.org); version X! Tandem  
13 Alanine (2017.2.1.4)). X! Tandem was set up to search the uniprotgiardiainintestinalis\_Craprev  
14 database (unknown version, 14528 entries) assuming the digestion enzyme trypsin. X! Tandem  
15 was searched with a fragment ion mass tolerance of 20 PPM and a parent ion tolerance of 20  
16 PPM. Glu->pyro-Glu of the n-terminus, ammonia-loss of the n-terminus, gln->pyro-Glu of the n-  
17 terminus, deamidated of asparagine and glutamine, oxidation of methionine and tryptophan and  
18 dioxidation of methionine and tryptophan were specified in X! Tandem as variable modifications.

19

1 Scaffold (version Scaffold\_4.8.4, Proteome Software Inc., Portland, OR) was used to validate  
2 MS/MS based peptide and protein identifications. Peptide identifications were accepted if they  
3 exceeded specific database search engine thresholds. Protein identifications were accepted if  
4 they contained at least 5 identified peptides. Proteins that contained similar peptides and could  
5 not be differentiated based on MS/MS analysis alone were grouped to satisfy the principles of  
6 parsimony. Proteins sharing significant peptide evidence were grouped into clusters.

### 7 ***Live imaging of GFP-tagged DAP strains***

8 Three dimensional stacks were acquired using the Metamorph image acquisition software (MDS  
9 Technologies) with a Leica DMI 6000 wide-field inverted fluorescence microscope with a PlanApo  
10 100X, NA 1.40 oil immersion objective. Serial sections of GFP-tagged strains were acquired at 0.2  
11  $\mu\text{m}$  intervals and deconvolved using Huygens Professional deconvolution software (SVI). Two-  
12 dimensional maximum intensity projections were created from the 3D stacks for presentation.

13

### 14 **Transmission Electron Microscopy**

15 Cytoskeleton preps of wild type and knockdown cells were prepared as above and applied to 400  
16 mesh formvar/carbon coated glow-discharged grids. Negative staining was performed by  
17 applying 1% phosphotungstic acid, pH 5.4 and dried by blotting without washes. For then  
18 sections, pelleted Giardia or Giardia attached to aclar hole punches were fixed for ten minutes in  
19 4% paraformaldehyde and secondarily fixed for 1 hour in 1% osmium tetroxide. Fixative was  
20 washed three times from the cells with cold ddH<sub>2</sub>O. Dehydration follows through ascending  
21 concentrations of ethanol, 30, 50%, then incubated for 1 hour in 2% Uranyl acetate in 50% ETOH.

1 Dehydration was completed through 70%, 95% x 3, ending with three changes in 100% ETOH for  
2 a minimum of 10 minutes each change. Cell were embedded in 1:1 epoxy resin:acetone overnight  
3 at room temperature. The next day the resin was removed and replaced with 100% 2x's for 2 hrs  
4 each. The aclar discs were placed at the bottom of a flat bottom beam capsule with the cells  
5 facing up and the capsule was filled with fresh resin. The blocks were polymerized at 70C  
6 overnight. The blocks were trimmed and thin sections were cut with a Leica UCT ultramicrotome  
7 (Leica Ultracut UCT, Leica, Vienna, Austria) and stained with uranyl acetate and lead citrate  
8 before viewing in the Talos L120C electron microscope (FEI/ThermoScientific Company,  
9 Hillsboro, OR., U.S.A. made in Eindhoven, The Netherlands) at 100KV. Images were acquired  
10 using the fully integrated Ceta CMOS camera.

11

## 12 **Results**

### 13 **Revised cytoskeletal fractionation of ventral disc**

14 To identify key structural features of the ventral disc and uncover new DAPs, we adapted a  
15 biochemical fractionation protocol and performed mass spectrometry on two fractions [10, 11,  
16 22, 23]. *In vitro* isolated ventral discs are stable in PHEM buffer for weeks. To break apart this  
17 stable structure, a step-wise fractionation can be performed in which the crossbridges and other  
18 proteins are first dissolved using a chaotropic TRIS solution (fraction 2, Figure 2). Fraction 2  
19 contained our top structural candidates because dissolution of these proteins causes significant  
20 changes to the ventral disc ultrastructure, including opening of the normally closed ventral disc  
21 spiral and separation of microtubule/microribbon pairs from their lateral counterparts. The

1 microtubules in these destabilized ventral discs retain some degree of curvature, likely because  
2 microribbons remain attached to the microtubules [13, 22]. We verified the dissolution of  
3 crossbridges in fraction 2 using electron microscopy (Figure 2). Microribbons are then dissolved  
4 by alternating to a high pH HEPES solution (fraction 3). Consistent with observations from other  
5 labs, flagellar components are the predominate leftovers after MR dissolution. We performed  
6 mass spectrometry on two independent extractions of fractions 2 and 3 and subtracted the  
7 proteins identified in fraction 3 from those identified in fraction 2 in order to narrow down our  
8 structural candidate list (Table 1).

### 9 **Mass spectrometry of fractions**

10 One hundred and five proteins were identified with at least five hits in fraction 2 or fraction 3  
11 after mass spectrometry. Of these, 61 proteins are GFP tagged and 26 have verified ventral disc  
12 localization. Highly abundant cytoskeletal proteins were identified in every fraction sampled  
13 (tubulin, MBP, delta giardin, etc.). Proteins enriched in the microribbon fraction were always  
14 identified in the crossbridge fraction, likely due to the intimate relationship these structures  
15 share. Consistent with previously published data, known microribbon proteins delta giardin,  
16 Salp-1, beta giardin and gamma giardin were found in the microribbon fraction.

17 Sixty-two proteins were found to be exclusively enriched in fraction 2 compared to fraction 3. Of  
18 these, thirteen proteins displayed ventral disc localization (Figure 4,5). Fraction 2 contains other  
19 structures associated with the Giardia cytoskeleton including the lateral crest that surrounds the  
20 perimeter of the ventral disc, the basal bodies, and the funis. Thus, fraction 2 is not limited to  
21 only crossbridge proteins, but likely contains crossbridge proteins in solution. We predicted that

1 specific crossbridge proteins would be critical to maintaining the ventral disc ultrastructure  
2 because when the crossbridges are dissolved *in vitro*, the ventral disc falls apart (Figure 2) [22].  
3 Gene knockdown candidates were prioritized based on two criteria: 1) proteins found exclusively  
4 in the crossbridge fraction, and 2) proteins that localized to the ventral disc body. Seven proteins  
5 met both stipulations (Figure 4). An additional six proteins were found exclusively in fraction 2,  
6 however these proteins displayed disc rim localization. DAP\_13981 was previously determined  
7 to be a lateral crest component via immunogold EM. Other outer disc proteins may be  
8 components of the lateral crest [4].

9 ***The disc is primarily composed of proteins lacking known MT-binding properties***

10 GFP tagging of candidates from each fraction uncovered 55 new DAPs, bringing the total number  
11 of known DAPs to eighty-seven (Figure 3). The majority of these proteins contain no predicted  
12 homology to known proteins [24]. The next most populated group contains Ankyrin repeats (29)  
13 followed by NEK kinases (13). We predict that many of these hypothetical and Ankyrin-containing  
14 proteins are structural components of the ventral disc that contribute to ventral disc stability.

15 In a recent proteomic analysis of detergent-extracted, isolated ventral discs, over twenty  
16 new candidate DAPs were identified that specifically localize to regions of the ventral disc or  
17 lateral crest [4]. In an ongoing GFP tagging project associated with the GiardiaDB [25], the  
18 number of DAPs has increased to closer to ninety (see TABLE 1). Like gamma-giardin [26], twenty-  
19 six DAPs lack any homology to proteins in other eukaryotes. One non-homologous DAP, median  
20 body protein (MBP, DAP16343), is associated with the disc spiral MT array, particularly with the  
21 overlap zone. MBP has been shown to be necessary for proper ventral disc biogenesis and

1 function [27]. Close to thirty DAPs simply contain ankyrin repeat domains. Disc-associated  
2 ankyrin repeat proteins may contribute to disc assembly or architecture, as ankyrin repeat  
3 proteins are known to mediate protein-protein interactions, protein folding, and protein stability  
4 [20].

5         Some DAPs share homology with members of conserved protein families, including: three  
6 members of the striated fiber (SF)–assemblins (beta-giardin, delta-giardin, and SALP-1 [28]); four  
7 annexin family members (e.g., alpha-giardins [29-32]), and at least twelve NEK kinases (TABLE 1).  
8 The SF-assemblin homologs beta-giardin, delta-giardin, and SALP-1 [28] likely form the structural  
9 basis of the microribbons upon which other microribbon-associated proteins assemble [18] (see  
10 TABLE 1). Beta-giardin does not turn over following photobleaching, consistent with the  
11 hyperstable state of disc microtubules [21]. *Giardia* has an expanded repertoire of over 70 NEK  
12 kinases [33], and NEK kinases have been associated with the cytoskeleton in other eukaryotes  
13 [34]. Nine of the twelve disc-associated NEKs are putative pseudokinases that lack conserved  
14 catalytic residues, however may still retain kinase activity [4].

15         Despite the fact that many well-known MAPs (EB1, XMAP215, and katanin) and motors  
16 (kinesins and dyneins) are present in the *Giardia* genome [35], these proteins localize to the  
17 *Giardia* flagella or spindle, but not to the ventral disc (TABLE 1). Of the over eighty DAPs identified  
18 to date, only DAP5374, a CAP-Gly protein, has a conserved microtubule binding motif [36] and  
19 thus could interact with tubulin monomers, dimers, and MT lattices. Only one of the twenty-four  
20 *Giardia* kinesins – kinesin-6a (DAP102455) – localizes to the ventral disc, in the disc margin region.  
21 DAP16263, a homolog of DIP13, also localizes to the disc. DIP13 belongs to a MT-associated

1 protein family conserved in diverse protists, plants, and animals that have flagellated cell stages  
2 [37, 38]. DIP13 homologs contain a conserved “KREE” binding motif that directly binds MTs [37];  
3 however, the *Giardia* DIP13 homolog lacks this motif. In *Chlamydomonas*, DIP13 localizes to the  
4 centrioles and to cytoplasmic and flagellar MTs, and may stabilize or connect MTs to other  
5 cellular structures [37].

6 DAPs are primarily uncharacterized with respect to their microtubule binding or  
7 biochemical properties. Many known DAPs are likely components of the disc substructures (e.g.,  
8 microribbons, crossbridges, sidearms, or paddles), whereas other DAPs may directly influence  
9 ventral disc MT dynamics including MT nucleation, MT + end binding, MT stability, and MT  
10 curvature and structure. DAPs likely generate and stabilize the curved spiral array of the ventral  
11 disc microtubules [16, 17]. Furthermore, DAPs may be required for the overall disc  
12 conformational dynamics and domed shape hypothesized to be necessary for parasite  
13 attachment [27]. Whether conserved MAPs play a role in ventral disc biogenesis or whether  
14 ventral disc biogenesis is governed by novel DAPs must also be determined. Given a high-  
15 resolution structure and a growing list of upwards of ninety disc proteins, the next steps in  
16 understanding the functioning of the ventral disc should include assigning disc proteins to the  
17 various substructures [17].

### 18 ***Regional variation in the structure and composition of the ventral disc***

19 Recently, Brown et al. [17] defined specific regional variations in the ventral disc architecture  
20 that, in concert with subcellular localization of DAPs [4], articulate distinct structural regions of  
21 the ventral disc (FIGURE 1). These variations include differences in the size and spacing of the

1 substructures, as well as variations in protein densities within individual substructures. For  
2 example, microribbons vary in height (from 55 to about 120 nm) and their angles relative to  
3 microtubules change throughout the disc architecture [17]. Microribbons are entirely absent in  
4 the dense bands and are partially formed in the supernumerary MT array. The lateral packing of  
5 microtubule–microribbon complexes also varies substantially (about 25 nm spacing in the dense  
6 bands to about 80 nm in the disc body), and lateral packing distance may be governed by  
7 crossbridge extension or contraction [17] [12]. At the disc margin, microtubule–microribbon  
8 complexes may function as outer, laterally contractile lids that aid the disc in clamping onto the  
9 intestinal microvilli [17]. In the ventral groove region, located at the posterior of the disc, disc  
10 MTs lose much of their curvature [17]. Due to regional variations, a single microtubule can be  
11 coated with different protein densities in different disc regions, beginning at the dense band  
12 nucleation zone and terminating at the disc margin (FIGURE 1). The structural variation in the  
13 disc defined by cryo-ET is consistent with the distinct localization patterns of DAPs observed in  
14 our GFP screen. These localizations delineate the disc body (43 DAPs), the disc margin or lateral  
15 crest (43 DAPs), the overlap zone (26 DAPs), the ventral groove (18 DAPs), and the dense bands  
16 or supernumerary MTs (15 DAPs) (see FIGURE 1 and TABLE 1).

## 17 **Discussion**

18 Given the finite and relatively small number of known proteins that regulate microtubule  
19 dynamics and assembly, how do diverse eukaryotic cells create elaborate microtubule  
20 structures? We are at the very early stages of understanding the principles governing the extreme  
21 variation in cytoskeletal organelle assembly and function. The complex architecture and



1 functional abilities of the ventral disc challenges our conceptions of the capabilities of  
2 cytoskeletal polymers. At least with respect to the *Giardia* ventral disc, the intricate architecture  
3 is primarily composed of novel, non-homologous proteins. The function and mechanism by which  
4 regional variation in disc proteins is generated is unknown; however, the invention of novel  
5 microtubule binding or nucleation properties may facilitate the assembly of microtubule  
6 polymers into unique arrays and organelles with new functions. In this fascinating emerging  
7 model system, the ongoing development of molecular genetic and biochemical tools [19, 39, 40]  
8 will be central toward understanding not only disc architecture and assembly, but also the overall  
9 disc conformational dynamics that promote attachment to the host. How has *Giardia* modified  
10 conserved tubulins to form the *Giardia*-specific ventral disc attachment organelle? With this  
11 work, eighty-seven DAPs have now been identified, most of which share little to no homology  
12 with any known protein. The novelty of these proteins likely contributes to the manipulation of  
13 microtubule structure and behavior. In addition to *Giardia*-specific hypothetical proteins, many  
14 DAPs contain ankyrin repeat domains or NEK kinase domains, suggesting the importance of these  
15 particular domains to ventral disc formation and function.

16 Previous work has noted the importance of the crossbridges to ventral disc stability. Holberton  
17 and Ward observed that triton extracted ventral discs would lose their crossbridges over time  
18 [22]. When enough of the crossbridges disappeared, they saw unwinding of the ventral disc,  
19 especially at the ventral groove region. Despite these structural changes, the microtubules  
20 remained largely curved suggesting that the curved nature of ventral disc microtubules may be  
21 controlled by the microribbons. Consistently, our cytoskeletal preps lose nearly all of their  
22 crossbridges into fraction 2, yet curvature of the microtubule/microribbon structure remains

1 (Figure 2). Holberton argues that mild dissolution of CBs results in a flat disc that is more  
2 energetically stable with fully extended CBs, and that outer ventral disc structures may help to  
3 hold the lattice in the spiral conformation. Our lab has observed that the ability of the ventral  
4 disc to form a dome is crucial for functional attachment of *Giardia* to surfaces [27]. Therefore,  
5 the crossbridges may be critical for both structure and function of the ventral disc.

6 Recent studies reveal the interaction between ankyrin proteins and the microtubule cytoskeleton  
7 in diverse eukaryotes. The apicomplexan parasite, *Toxoplasma gondii*, uses a complex  
8 microtubule-based organelle termed the conoid for host cell invasion. The conoid is analogous  
9 to the ventral disc in that this stable microtubule structure largely contains non-conserved  
10 hypothetical proteins. Recently, Ankyrin-repeat containing proteins have been found to be  
11 crucial for structural integrity and function of the conoid [41]. In humans, Ankyrin proteins have  
12 been recognized to serve crucial roles in erythrocytes, muscles, and neurons, where they help  
13 stabilize subsets of microtubules [42]. Furthermore, ankyrins are known to interact directly with  
14 tubulins in vitro [43, 44]. These works emphasize the adaptability of Ankyrin repeat domains to  
15 facilitate microtubule processes and stabilize microtubule arrays. Consistently, truncation of  
16 Ankyrin repeat domains from both DAP\_5188 and DAP\_7268 affects localization of these  
17 proteins within the ventral disc. Because of their propensity for protein/protein interactions, as  
18 well as their expansion in the *Giardia* genome, Ankyrin repeat proteins are candidates for helping  
19 us understand evolution of the ventral disc. The expansion and variation of Ankyrin repeat  
20 proteins could serve as adapters to augment microtubule behavior, contributing to ventral disc  
21 biogenesis.

1           The complex ventral disc spiral MT array and associated structures (e.g., lateral crest)  
2     have evolved only in *Giardia* species. Complex cytoskeletal organelles like the disc could evolve  
3     by cooption, modification and elaboration of existing proteins or structures like flagella, or  
4     through the invention of new MT-binding proteins or other components. The sheer number of  
5     non-homologous proteins in the disc suggests that much of the complexity of the ventral disc has  
6     evolved through the invention of novel cytoskeletal proteins. The microribbon component of the  
7     ventral disc may be derived from ancestral flagellar structures as SF-assemblins are known to be  
8     associated with flagellar root structures in other protists [45] including the *Toxoplasma* apical  
9     complex [46].

#### 10    ***Novel protein complexes define the intricate cup-shaped architecture of the ventral disc***

11    How does a microtubule structure lacking dynamic instability generate attachment forces? While  
12    the exogenous addition of ATP to isolated *Giardia* cytoskeletons is sufficient to drive flagellar  
13    beating, exogenous addition of ATP does not result in disc conformational dynamics [22].  
14    Suction-based forces could theoretically be generated directly via an overall conformational  
15    change of the ventral disc from a flattened to a domed shape, resulting in a negative pressure  
16    differential relative to the outside medium [27]. If the disc substructures (e.g., microribbons,  
17    crossbridges, sidearms) are flexible, subtle substructure movements could be sufficient to  
18    generate the conformational changes required for the initiation and maintenance of attachment  
19    in the absence of canonical MT dynamics (FIGURE 3). For example, knockdown of MBP  
20    (DAP16343) results in cells with an open and flattened ventral disc conformation that are unable  
21    to proceed to later stages of attachment, supporting the notion that early disc conformational

1 changes generate a negative pressure differential underneath the disc [47]. MBP associates  
2 specifically with the disc body, disc margin and overlap zone, as well as the median body, and the  
3 aberrant disc conformations observed after MBP knockdown are presumably the result of MBP  
4 depletion during disc biogenesis. A dome-shaped disc might also be required for proper lateral  
5 crest seal formation [48] in early stages of attachment.

### 6 ***Cytoskeletal innovations in protists expand the range of microtubule polymer functions***

7 Paradigms of microtubule function, dynamics, assembly, and nucleation have been shaped by  
8 the study of the dynamic mitotic spindle and cilium in model systems. Cell biological models tend  
9 toward macroscopic eukaryotes, yet microbial eukaryotes, or protists, have a myriad of unique  
10 interphase cytoskeletal organelles that have been described for nearly 300 years [49]. Non-  
11 canonical cytoskeletal arrays confer unique and adaptive functions to eukaryotic cells –  
12 expanding the known functional capacities of microtubule polymers and challenging  
13 conventional notions of microtubule organellar dynamics.

14

## 15 **Materials and Methods**

### 16 **Giardia Culture**

17 *Giardia intestinalis* strain WBC6 (ATCC 50803) trophozoites were maintained at 37°C in modified  
18 TYI-S\_33 medium with bovine bile (26) in 16-ml screw-cap tubes (Fisher Scientific). Upon  
19 reaching confluency, the strain was split by first placing tubes on ice for 15 minutes then

1 transferring 0.5ml of detached culture to 11.5ml of warmed media. Prior to imaging, cells were  
2 washed 3x with warm 1xHBS to remove autofluorescence associated with culture media.

### 3 **Giardia GFP-tagged Strain Generation**

4 All strains were constructed as previously described (Hagen et al 2011). For C-terminal GFP  
5 episomal tag: All candidate DAP PCR forward primers were designed to bind 200 bp upstream of  
6 the gene to include the Giardia native promoter and contained the sequence CACC at the 5' end  
7 to facilitate directional cloning. Blunt-ended PCR amplicons were generated by PCR using  
8 PfuTurbo Hotstart PCR Mastermix (Stratagene) with Giardia intestinalis strain WBC6 genomic  
9 DNA. The candidate DAP PCR amplicons were subsequently subcloned into the Invitrogen  
10 pENTR/D-TOPO backbone to generate Gateway entry clones. Inserts in entry clones were  
11 sequenced to confirm the identity and correct orientation of the gene. To construct DAP-GFP  
12 fusions, positive entry clones were then recombined, via LR reaction, with a 1-fragment GFP  
13 tagging E. coli/Giardia shuttle destination vector (pcGFP1F.pac) using LR Clonase II Plus  
14 (Invitrogen). LR reactions were performed using 100 ng pcGFP1F.pac and 150 ng of DAP entry  
15 clone plasmid DNA. Positive clones were screened by digestion with *Ascl*, and bulk plasmid DNA  
16 was prepared using Qiagen's Plasmid Midi Kit. To create C-terminal GFP-tagged candidate DAP  
17 strains, Giardia intestinalis strain WBC6 was electroporated with roughly 20 mg of plasmid DNA  
18 (above) using the GenePulserXL (BioRad) under previously described conditions. Episomal DAP-  
19 GFP constructs were maintained in transformants using antibiotic selection (50 mg/ml  
20 puromycin).

### 21 **Biochemical Fractionation**

1 Detergent extraction of Giardia's microtubule cytoskeleton was done as previously described  
2 (Hagen et al. 2012). First, TYI-S-33 medium was decanted from one confluent 12 ml culture of  
3 trophozoites, cells were washed three times with warm 1X HBS. Cells were iced for 15 minutes  
4 in the last HBS wash, pelleted, and resuspended in 1x PHEM (60 mM PIPES, 25 mM HEPES, 10  
5 mM EGTA, 1 mM MgCl<sub>2</sub>, pH 7.4) containing 1% Triton X-100 and 1M KCl to demembrate. This  
6 solution was transferred to an Eppendorf tube and vortexed continuously at a medium setting  
7 for 30 minutes. To prevent proteolysis, protease inhibitors (Roche) were added to the  
8 preparation. Ventral disc cytoskeletons were then pelleted by centrifugation at 1000×g for 5  
9 minutes, and the pellets were washed two times in 1X PHEM lacking 1% Triton X-100. Sufficient  
10 extraction of cytoskeletons was confirmed by wet mount using DIC microscopy.

11 Cytoskeletons were fractionated as previously described (Holberton 1981, 1983, etc.) First, an  
12 aliquot of cytoskeletons in PHEM was retained as 'fraction 1.' Cytoskeletons were then pelleted,  
13 washed, and resuspended in CB buffer (10mM Tris, 1mM EDTA, pH 7.7) for 48 hours to dissolve  
14 the crossbridges. The leftover complexes were pelleted at 1000xG for 5 mins and the  
15 supernatant was retained as 'fraction 2.' Cytoskeletal complexes were washed and resuspended  
16 in MR buffer (10mM HEPES, 5mM EDTA, pH 8.7) for 48 hours to dissolve microribbons. The  
17 remaining tubulin complexes were pelleted, and the supernatant was retained as 'fraction 3.'  
18 Tubulin leftovers were resuspended in 1x PHEM and retained as 'fraction 4.'

## 19 **Mass Spectrometry**

20 All MS/MS samples were analyzed using X! Tandem (The GPM, [thegpm.org](http://thegpm.org); version X! Tandem  
21 Alanine (2017.2.1.4)). X! Tandem was set up to search the uniprot giardiainintestinalis\_Craprev

1 database (unknown version, 14528 entries) assuming the digestion enzyme trypsin. X! Tandem  
2 was searched with a fragment ion mass tolerance of 20 PPM and a parent ion tolerance of 20  
3 PPM. Glu->pyro-Glu of the n-terminus, ammonia-loss of the n-terminus, gln->pyro-Glu of the n-  
4 terminus, deamidated of asparagine and glutamine, oxidation of methionine and tryptophan and  
5 dioxidation of methionine and tryptophan were specified in X! Tandem as variable modifications.

6 Scaffold (version Scaffold\_4.8.4, Proteome Software Inc., Portland, OR) was used to validate  
7 MS/MS based peptide and protein identifications. Peptide identifications were accepted if they  
8 exceeded specific database search engine thresholds. Protein identifications were accepted if  
9 they contained at least 5 identified peptides. Proteins that contained similar peptides and could  
10 not be differentiated based on MS/MS analysis alone were grouped to satisfy the principles of  
11 parsimony. Proteins sharing significant peptide evidence were grouped into clusters.

## 12 **Confocal Microscopy**

13 3D stacks and time lapse movies were acquired of live cells grown in 96-well #1.5 black glass  
14 bottom imaging plates (In Vitro Scientific). Images were acquired with the spinning-disk module  
15 of a Marianas SDC Real-Time 3D Confocal-TIRF microscope (Intelligent Imaging Innovations) fit  
16 with a Yokogawa spinning-disk head, a 63×/1.3 NA oil-immersion objective, and electron-  
17 multiplying charge-coupled device camera. Acquisition was controlled by SlideBook 6 software  
18 (3i Incorporated). All raw images were exposed and scaled with the same parameters.

## 19 **Transmission Electron Microscopy**

1 Cytoskeleton preps of wild type and knockdown cells were prepared as above and applied to 400  
2 mesh formvar/carbon coated glow-discharged grids. Negative staining was performed by  
3 applying 1% phosphotungstic acid, pH 5.4 and dried by blotting without washes. For then  
4 sections, pelleted Giardia or Giardia attached to aclar hole punches were fixed for ten minutes in  
5 4% paraformaldehyde and secondarily fixed for 1 hour in 1% osmium tetroxide. Fixative was  
6 washed three times from the cells with cold ddH<sub>2</sub>O. Dehydration follows through ascending  
7 concentrations of ethanol, 30, 50%, then incubated for 1 hour in 2% Uranyl acetate in 50% ETOH.  
8 Dehydration was completed through 70%, 95% x 3, ending with three changes in 100% ETOH for  
9 a minimum of 10 minutes each change. Cell were embedded in 1:1 epoxy resin:acetone overnight  
10 at room temperature. The next day the resin was removed and replaced with 100% 2x's for 2 hrs  
11 each. The aclar discs were placed at the bottom of a flat bottom beam capsule with the cells  
12 facing up and the capsule was filled with fresh resin. The blocks were polymerized at 70C  
13 overnight. The blocks were trimmed, and thin sections were cut with a Leica UCT ultramicrotome  
14 (Leica Ultracut UCT, Leica, Vienna, Austria) and stained with uranyl acetate and lead citrate  
15 before viewing in the Talos L120C electron microscope (FEI/ThermoScientific Company,  
16 Hillsboro, OR., U.S.A. made in Eindhoven, The Netherlands) at 100KV. Images were acquired  
17 using the fully integrated Ceta CMOS camera.

## 18 **Acknowledgements**

19 Thank you to Michael Paddy of the UC Davis MCB Microscopy Core with helpful advice on SDC  
20 and SIM microscopes. Thank you to Patricia Kysar of the UC Davis MCB Electron Microscopy Lab  
21 for advice and training on TEM. Thank you to Michelle Salemi and Brett Phinney at the UCD



- 1 Proteomics Core for help with mass spectroscopy. Kari Hagen and Shane McInally provided
- 2 helpful readings of manuscript drafts.
- 3

1 **Figure legends**

2 **Figure 1. Ventral disc substructures support the microtubule array.** A schematic of the ventral  
3 disc indicated the primary structure elements is shown in panel A: OZ: overlap zone, BB: basal  
4 bodies, LC: lateral crest, VG: ventral groove, FU: funis (A), MT: microtubule, MR: microribbon, CB:  
5 crossbridge (B,C). In B, a negative-stained cytoskeletal preparation of the ventral disc In C, TEM  
6 of thin sections from whole embedded *Giardia* trophozoites show both microribbons (MR)  
7 crossbridges (CB) complexes associated with the entire microtubule (MT) spiral organelle (D). A  
8 section of the lateral crest (LC) is on the edge of disc (C). In E, the overlap zone (OZ) of the MT  
9 spiral array, along with the MR-CB complexes are seen in cross section.

10 **Figure 2. Prominent disc structural elements are hyperstable.** Ventral disc structure is  
11 insensitive to MT stabilizing or depolymerizing drugs such as taxol or nocodazole (A), yet flagella  
12 and median body are dynamic and sensitive to drugs (B). Much of ventral disc structural elements  
13 such as microribbons and microtubules remain intact following extraction in up to 2M KCl (C),  
14 and tagged microribbon (delta giardin), overlap zone (MBP) proteins remain associated with the  
15 disc microtubule array even after extraction with 2M KCl.

16 **Figure 3: Sequential fractionation of ventral disc substructures.** Cartoon depicts ventral disc  
17 fractionation (A). First, membrane and cytosol are removed from the *Giardia* microtubule  
18 cytoskeleton (P1) in panels B, and negative stain electron microscopy image in D. Panel C shows  
19 a representation tubulin (purple) and delta-giardin (green) immunostained cytoskeleton from P1  
20 fraction. Next, crossbridges and other proteins are removed, destabilizing the ventral disc (P3)  
21 in E, and tubulin-stained image of dissociated discs in F. SDS-PAGE indicates different proteins

1 that are enriched in each pellet and supernatant (G) and in the Venn Diagram comparisons of  
2 mass spectrometry of fractions (E).

3 **Figure 4. Many of the 87 disc associated proteins (DAPs) localize to other cytoskeletal**  
4 **structures.** Localizations were categorized into those associated localizing exclusively to the disc  
5 (disc only, N=42), or also to the flagella (including the basal bodies, cytoplasmic axonemes and  
6 membrane bound regions of the eight flagella (N=31), as well as the median body(N=12), lateral  
7 crest (N=4) are presented as in the Venn diagram comparisons. Representative localizations are  
8 also shown for each of the categories of localizations for the GFP tagged DAP strains.

9 **Figure 5. Disc-associated proteins localize to specific structurally distinct regions of the ventral**  
10 **disc.** The 54 disc (and median body-localizing) DAPs were compared with respect to localization  
11 to the disc MT spiral array (disc body), disc margin (DM), ventral groove (VG), dense bands (DB),  
12 and overlap zone (OZ). Representative DAPs are presented to demonstrate the number and type  
13 of regional localization categories presented in the Venn Diagram.

14

15

16

## 1 Bibliography

- 2 1. Russell, J.J., et al., *Non-model model organisms*. BMC Biol, 2017. **15**(1): p. 55.
- 3 2. Hu, K., et al., *Cytoskeletal components of an invasion machine--the apical complex of*  
4 *Toxoplasma gondii*. PLoS Pathog, 2006. **2**(2): p. e13.
- 5 3. Preisner, H., et al., *The Cytoskeleton of Parabasalian Parasites Comprises Proteins that*  
6 *Share Properties Common to Intermediate Filament Proteins*. Protist, 2016. **167**(6): p. 526-  
7 543.
- 8 4. Hagen, K.D., et al., *Novel structural components of the ventral disc and lateral crest in*  
9 *Giardia intestinalis*. PLoS Negl Trop Dis, 2011. **5**(12): p. e1442.
- 10 5. Hampl, V., et al., *Phylogenomic analyses support the monophyly of Excavata and resolve*  
11 *relationships among eukaryotic "supergroups"*. Proc Natl Acad Sci U S A, 2009. **106**(10): p.  
12 3859-64.
- 13 6. Morrissette, N., *Targeting Toxoplasma tubules: tubulin, microtubules, and associated*  
14 *proteins in a human pathogen*. Eukaryot Cell, 2015. **14**(1): p. 2-12.
- 15 7. Einarsson, E., S. Ma'ayeh, and S.G. Svard, *An up-date on Giardia and giardiasis*. Curr Opin  
16 Microbiol, 2016. **34**: p. 47-52.
- 17 8. Nosala, C. and S.C. Dawson, *The Critical Role of the Cytoskeleton in the Pathogenesis of*  
18 *Giardia*. Curr Clin Microbiol Rep, 2015. **2**(4): p. 155-162.
- 19 9. Feely, D.E., J.V. Schollmeyer, and S.L. Erlandsen, *Giardia spp.: distribution of contractile*  
20 *proteins in the attachment organelle*. Exp Parasitol, 1982. **53**(1): p. 145-54.
- 21 10. Crossley, R. and D.V. Holberton, *Assembly of 2.5 nm filaments from giardin, a protein*  
22 *associated with cytoskeletal microtubules in Giardia*. J Cell Sci, 1985. **78**: p. 205-31.

- 1 11. Crossley, R. and D.V. Holberton, *Characterization of proteins from the cytoskeleton of*  
2 *Giardia lamblia*. J Cell Sci, 1983. **59**: p. 81-103.
- 3 12. Holberton, D.V., *Fine structure of the ventral disk apparatus and the mechanism of*  
4 *attachment in the flagellate Giardia muris*. J Cell Sci, 1973. **13**(1): p. 11-41.
- 5 13. Holberton, D.V., *Arrangement of subunits in microribbons from Giardia*. J Cell Sci, 1981.  
6 **47**: p. 167-85.
- 7 14. Friend, D.S., *The fine structure of Giardia muris*. J Cell Biol, 1966. **29**(2): p. 317-32.
- 8 15. Cheissin, E.M., *Ultrastructure of Lamblia Duodenalis. I. Body Surface, Sucking Disc and*  
9 *Median Bodies*. J Protozool, 1964. **11**: p. 91-8.
- 10 16. Schwartz, C.L., et al., *A detailed, hierarchical study of Giardia lamblia's ventral disc reveals*  
11 *novel microtubule-associated protein complexes*. PLoS One, 2012. **7**(9): p. e43783.
- 12 17. Brown, J.R., et al., *A detailed look at the cytoskeletal architecture of the Giardia lamblia*  
13 *ventral disc*. J Struct Biol, 2016. **194**(1): p. 38-48.
- 14 18. Feely, D.E., Hoberton, D.V., Erlandsen, S.L., *The Biology of Giardia*, in *Giardiasis*, E.A.  
15 Meyer, Editor. 1990, Elsevier: Amsterdam. p. 11-50.
- 16 19. Dawson, S.C., et al., *Kinesin-13 regulates flagellar, interphase, and mitotic microtubule*  
17 *dynamics in Giardia intestinalis*. Eukaryot Cell, 2007. **6**(12): p. 2354-64.
- 18 20. Li, J., A. Mahajan, and M.D. Tsai, *Ankyrin repeat: a unique motif mediating protein-protein*  
19 *interactions*. Biochemistry, 2006. **45**(51): p. 15168-78.
- 20 21. Dawson, S.C. and S.A. House, *Imaging and analysis of the microtubule cytoskeleton in*  
21 *Giardia*. Methods Cell Biol, 2010. **97**: p. 307-39.

- 1 22. Holberton, D.V. and A.P. Ward, *Isolation of the cytoskeleton from Giardia. Tubulin and a*  
2 *low-molecular-weight protein associated with microribbon structures.* J Cell Sci, 1981. **47**:  
3 p. 139-66.
- 4 23. Crossley, R. and D.V. Holberton, *Selective extraction with Sarkosyl and repolymerization*  
5 *in vitro of cytoskeleton proteins from Giardia.* J Cell Sci, 1983. **62**: p. 419-38.
- 6 24. Nosala, C., K.D. Hagen, and S.C. Dawson, *'Disc-o-Fever': Getting Down with Giardia's*  
7 *Groovy Microtubule Organelle.* Trends Cell Biol, 2018. **28**(2): p. 99-112.
- 8 25. Aurrecoechea, C., et al., *GiardiaDB and TrichDB: integrated genomic resources for the*  
9 *eukaryotic protist pathogens Giardia lamblia and Trichomonas vaginalis.* Nucleic Acids  
10 Res, 2009. **37**(Database issue): p. D526-30.
- 11 26. Nohria, A., R.A. Alonso, and D.A. Peattie, *Identification and characterization of gamma*  
12 *giardin and the gamma giardin gene from Giardia lamblia.* Mol Biochem Parasitol, 1992.  
13 **56**(1): p. 27-37.
- 14 27. Woessner, D.J. and S.C. Dawson, *The Giardia median body protein is a ventral disc protein*  
15 *that is critical for maintaining a domed disc conformation during attachment.* Eukaryot  
16 Cell, 2012. **11**(3): p. 292-301.
- 17 28. Palm, J.E., et al., *Identification of immunoreactive proteins during acute human giardiasis.*  
18 J Infect Dis, 2003. **187**(12): p. 1849-59.
- 19 29. Weiland, M.E., et al., *Annexin-like alpha giardins: a new cytoskeletal gene family in Giardia*  
20 *lamblia.* Int J Parasitol, 2005. **35**(6): p. 617-26.

- 1 30. Weiland, M.E., et al., *Characterisation of alpha-1 giardin: an immunodominant Giardia*  
2 *lamblia annexin with glycosaminoglycan-binding activity*. Int J Parasitol, 2003. **33**(12): p.  
3 1341-51.
- 4 31. Bauer, B., et al., *Functional identification of alpha 1-giardin as an annexin of Giardia*  
5 *lamblia*. FEMS Microbiol Lett, 1999. **173**(1): p. 147-53.
- 6 32. Peattie, D.A., *The giardins of Giardia lamblia: genes and proteins with promise*. Parasitol  
7 Today, 1990. **6**(2): p. 52-56.
- 8 33. Manning, G., et al., *The minimal kinome of Giardia lamblia illuminates early kinase*  
9 *evolution and unique parasite biology*. Genome biology, 2011. **12**(7): p. R66.
- 10 34. O'Regan, L., J. Blot, and A.M. Fry, *Mitotic regulation by NIMA-related kinases*. Cell Div,  
11 2007. **2**: p. 25.
- 12 35. Morrison, H.G., et al., *Genomic minimalism in the early diverging intestinal parasite*  
13 *Giardia lamblia*. Science, 2007. **317**(5846): p. 1921-6.
- 14 36. Weisbrich, A., et al., *Structure-function relationship of CAP-Gly domains*. Nat Struct Mol  
15 Biol, 2007. **14**(10): p. 959-67.
- 16 37. Pfannenschmid, F., et al., *Chlamydomonas DIP13 and human NA14: a new class of*  
17 *proteins associated with microtubule structures is involved in cell division*. J Cell Sci, 2003.  
18 **116**(Pt 8): p. 1449-62.
- 19 38. Fritz-Laylin, L.K., et al., *The genome of Naegleria gruberi illuminates early eukaryotic*  
20 *versatility*. Cell, 2010. **140**(5): p. 631-42.

- 1 39. Touz, M.C., J.T. Conrad, and T.E. Nash, *A novel palmitoyl acyl transferase controls surface*  
2 *protein palmitoylation and cytotoxicity in Giardia lamblia*. Mol Microbiol, 2005. **58**(4): p.  
3 999-1011.
- 4 40. Carpenter, M.L. and W.Z. Cande, *Using morpholinos for gene knockdown in Giardia*  
5 *intestinalis*. Eukaryot Cell, 2009. **8**(6): p. 916-9.
- 6 41. Long, S., et al., *A conserved ankyrin repeat-containing protein regulates conoid stability,*  
7 *motility and cell invasion in Toxoplasma gondii*. Nat Commun, 2017. **8**(1): p. 2236.
- 8 42. Goellner, B. and H. Aberle, *The synaptic cytoskeleton in development and disease*. Dev  
9 Neurobiol, 2012. **72**(1): p. 111-25.
- 10 43. Davis, J.Q. and V. Bennett, *Brain ankyrin. A membrane-associated protein with binding*  
11 *sites for spectrin, tubulin, and the cytoplasmic domain of the erythrocyte anion channel*. J  
12 Biol Chem, 1984. **259**(21): p. 13550-9.
- 13 44. Bennett, V. and J. Davis, *Erythrocyte ankyrin: immunoreactive analogues are associated*  
14 *with mitotic structures in cultured cells and with microtubules in brain*. Proc Natl Acad Sci  
15 U S A, 1981. **78**(12): p. 7550-4.
- 16 45. Weber, K., et al., *SF-assemblin, the structural protein of the 2-nm filaments from striated*  
17 *microtubule associated fibers of algal flagellar roots, forms a segmented coiled coil*. J Cell  
18 Biol, 1993. **121**(4): p. 837-45.
- 19 46. Francia, M.E., et al., *Cell division in Apicomplexan parasites is organized by a homolog of*  
20 *the striated rootlet fiber of algal flagella*. PLoS Biol, 2012. **10**(12): p. e1001444.
- 21 47. Hansen, W.R., et al., *Giardia lamblia attachment force is insensitive to surface treatments*.  
22 Eukaryot Cell, 2006. **5**(4): p. 781-3.



- 1 48. House, S.A., et al., *Giardia flagellar motility is not directly required to maintain attachment*  
2 *to surfaces*. PLoS Pathog, 2011. **7**(8): p. e1002167.
- 3 49. Dawson, S.C. and A.R. Paredez, *Alternative cytoskeletal landscapes: cytoskeletal novelty*  
4 *and evolution in basal excavate protists*. Curr Opin Cell Biol, 2013. **25**(1): p. 134-41.
- 5 1.
- 6

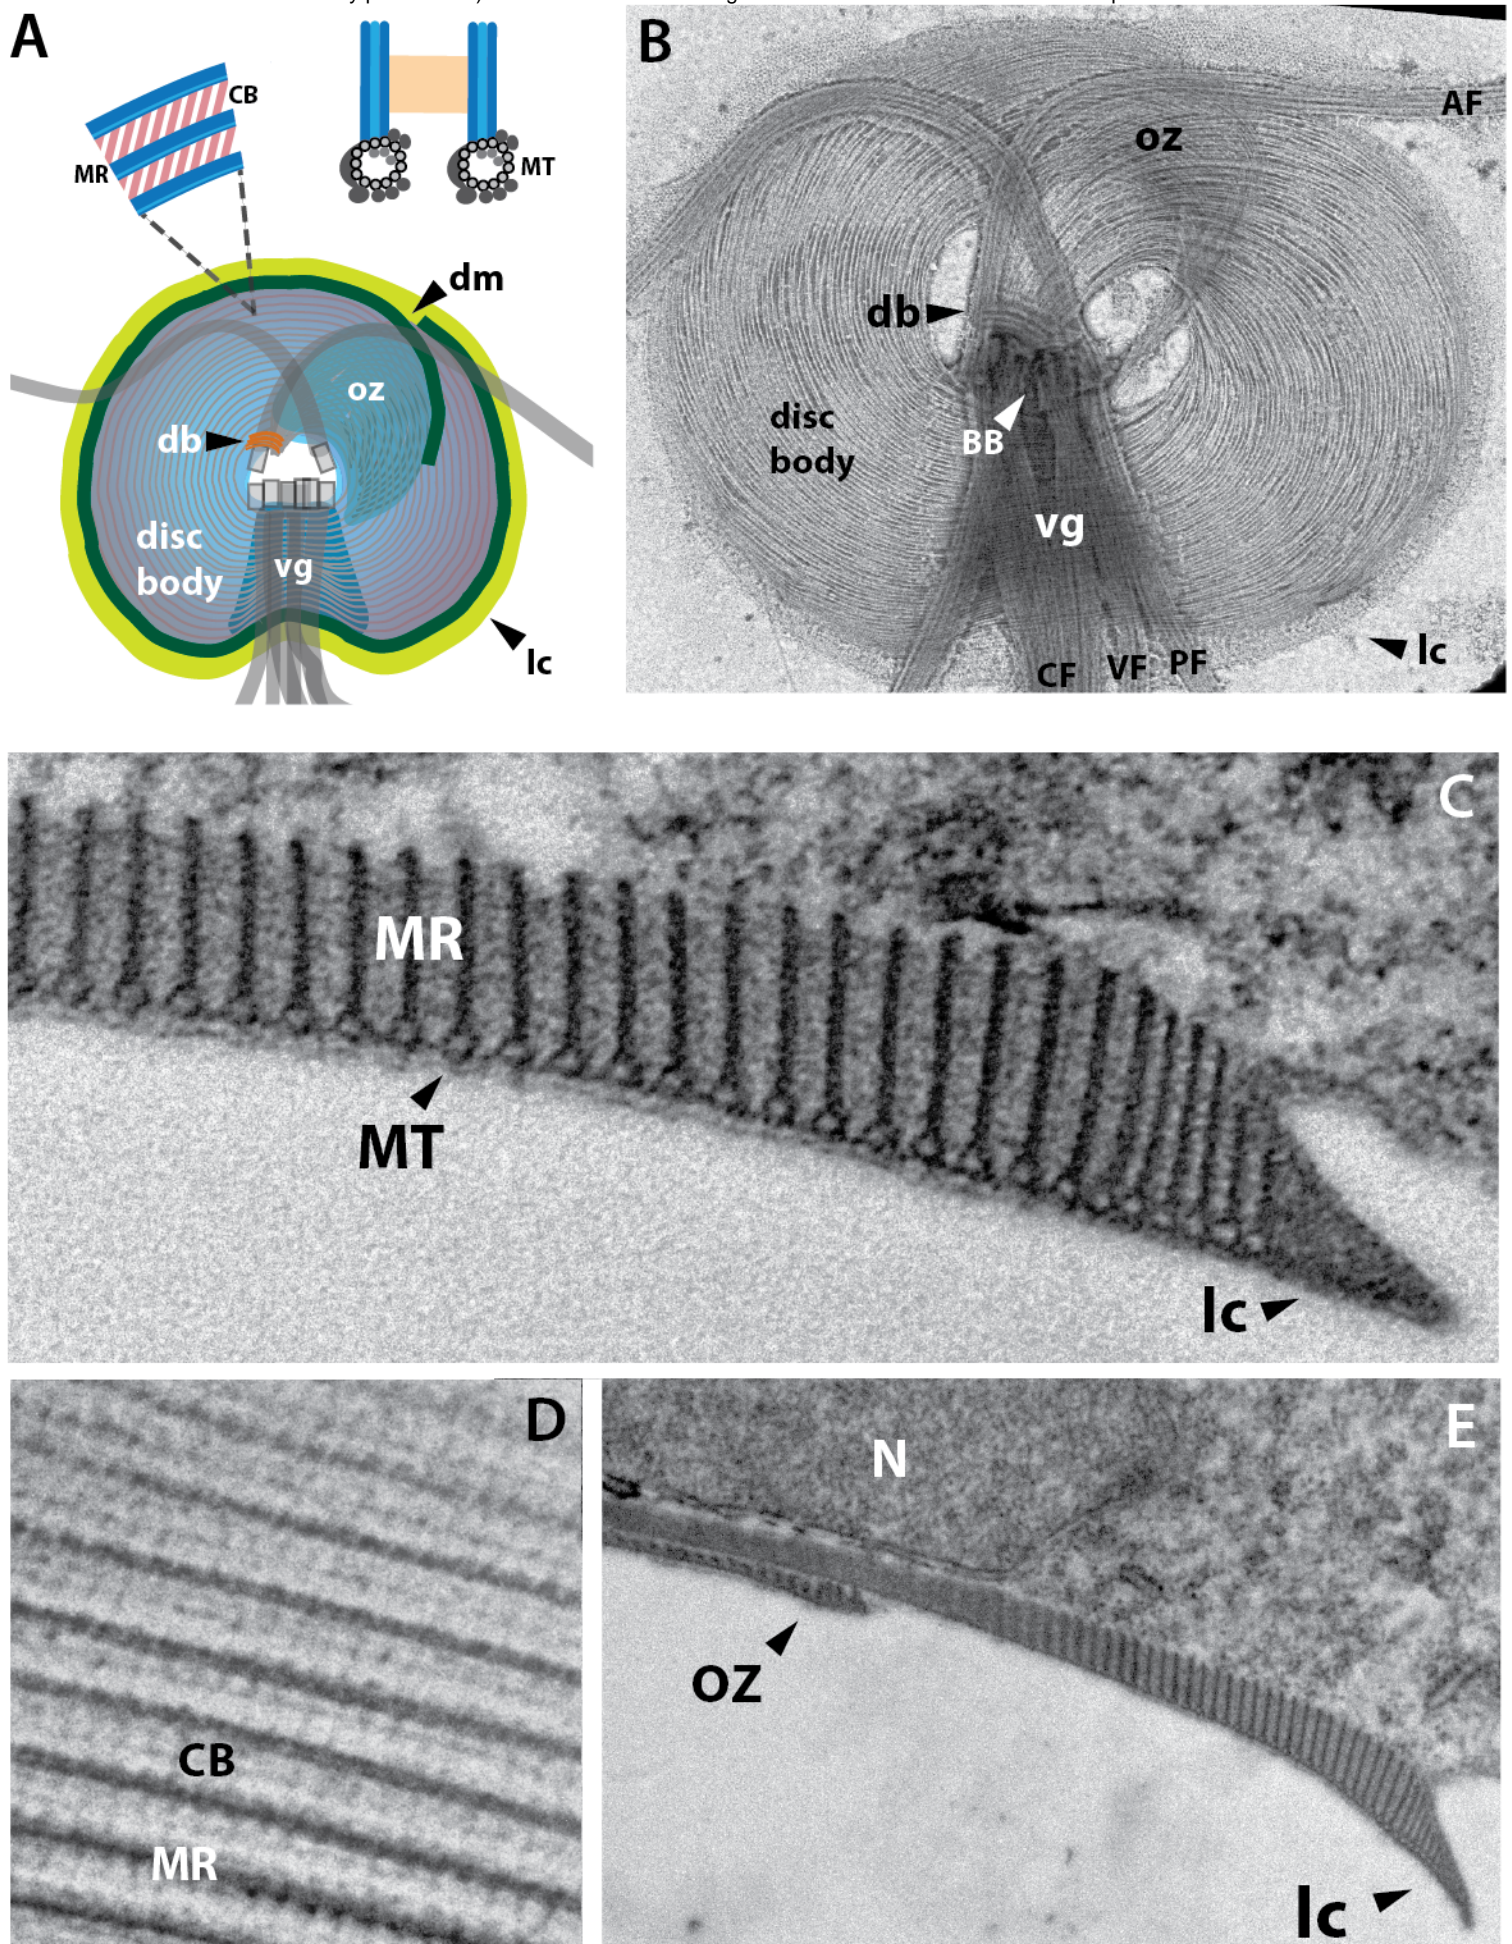

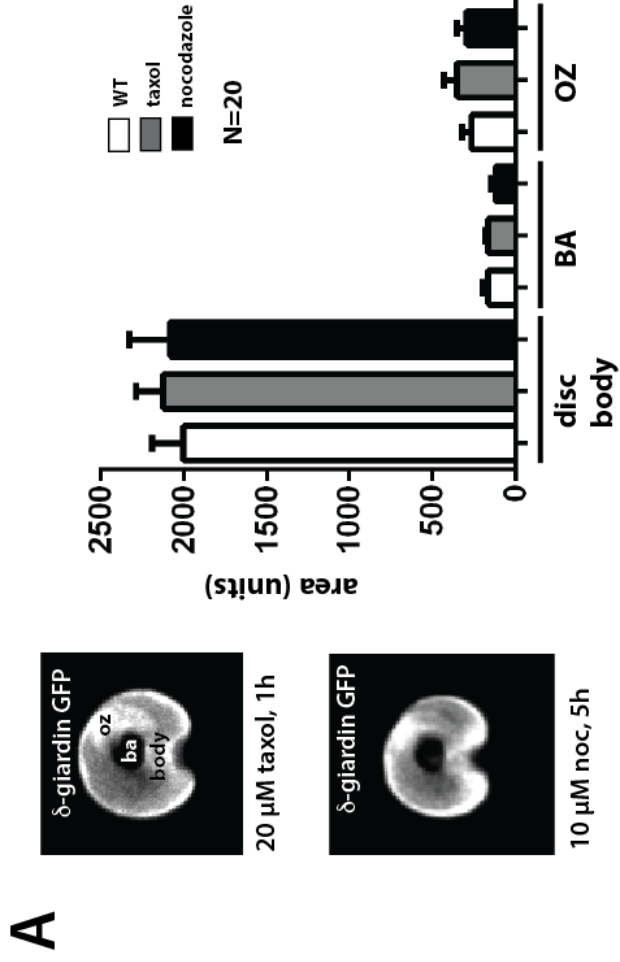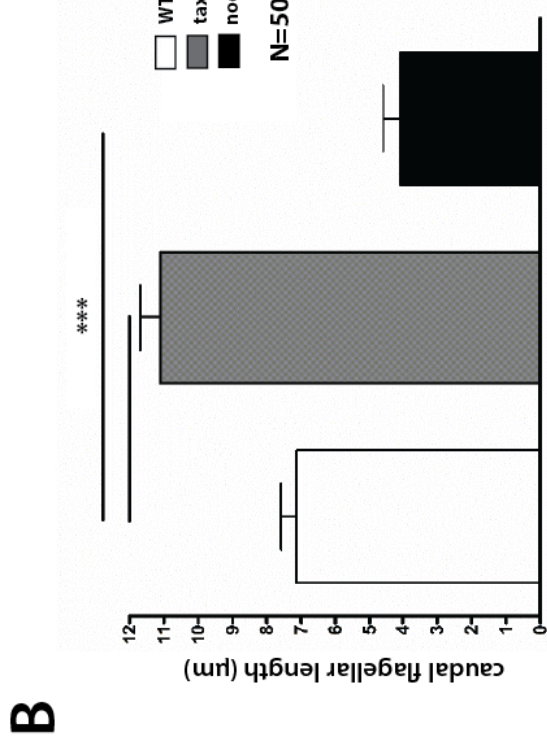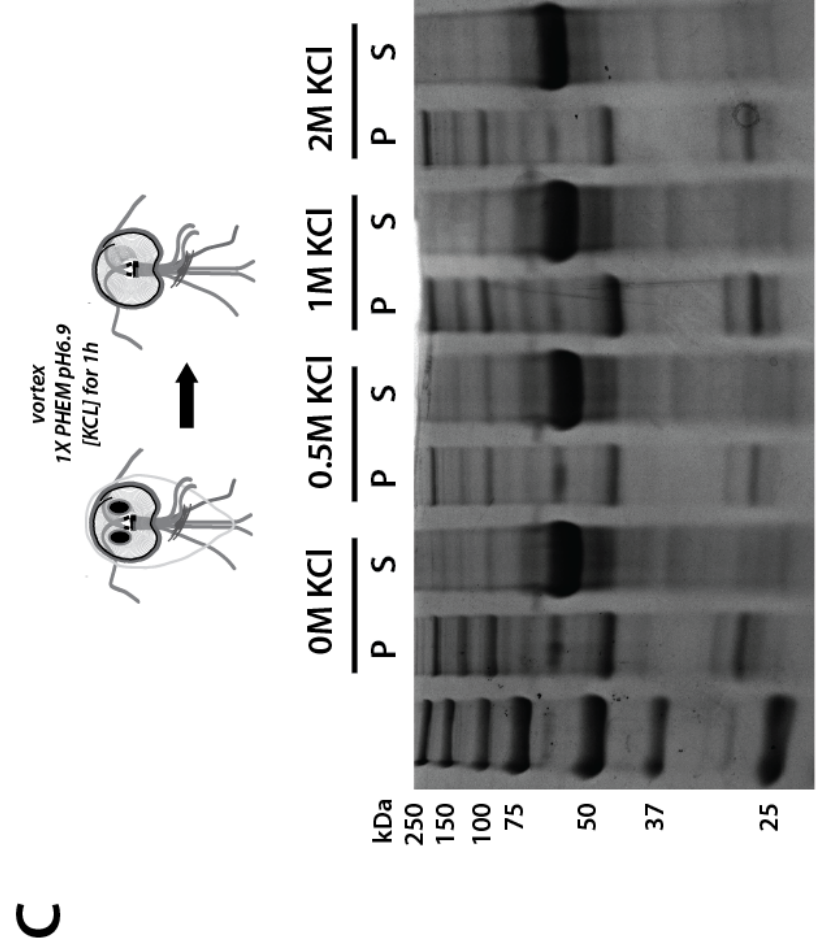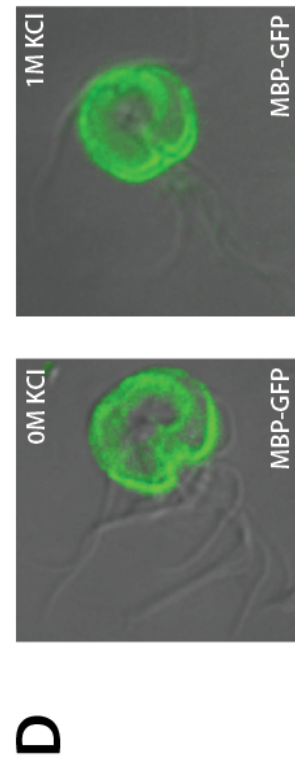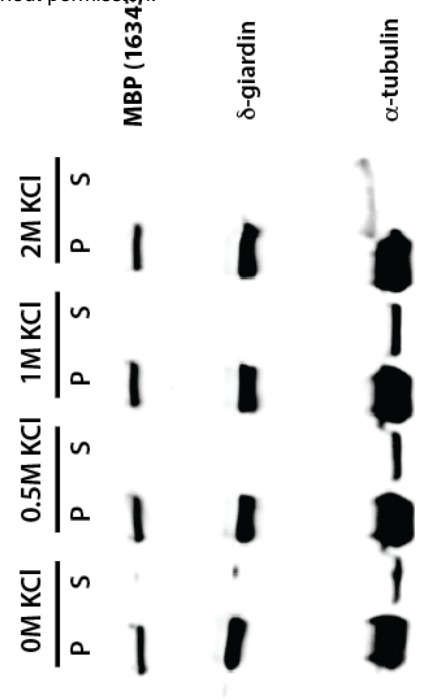

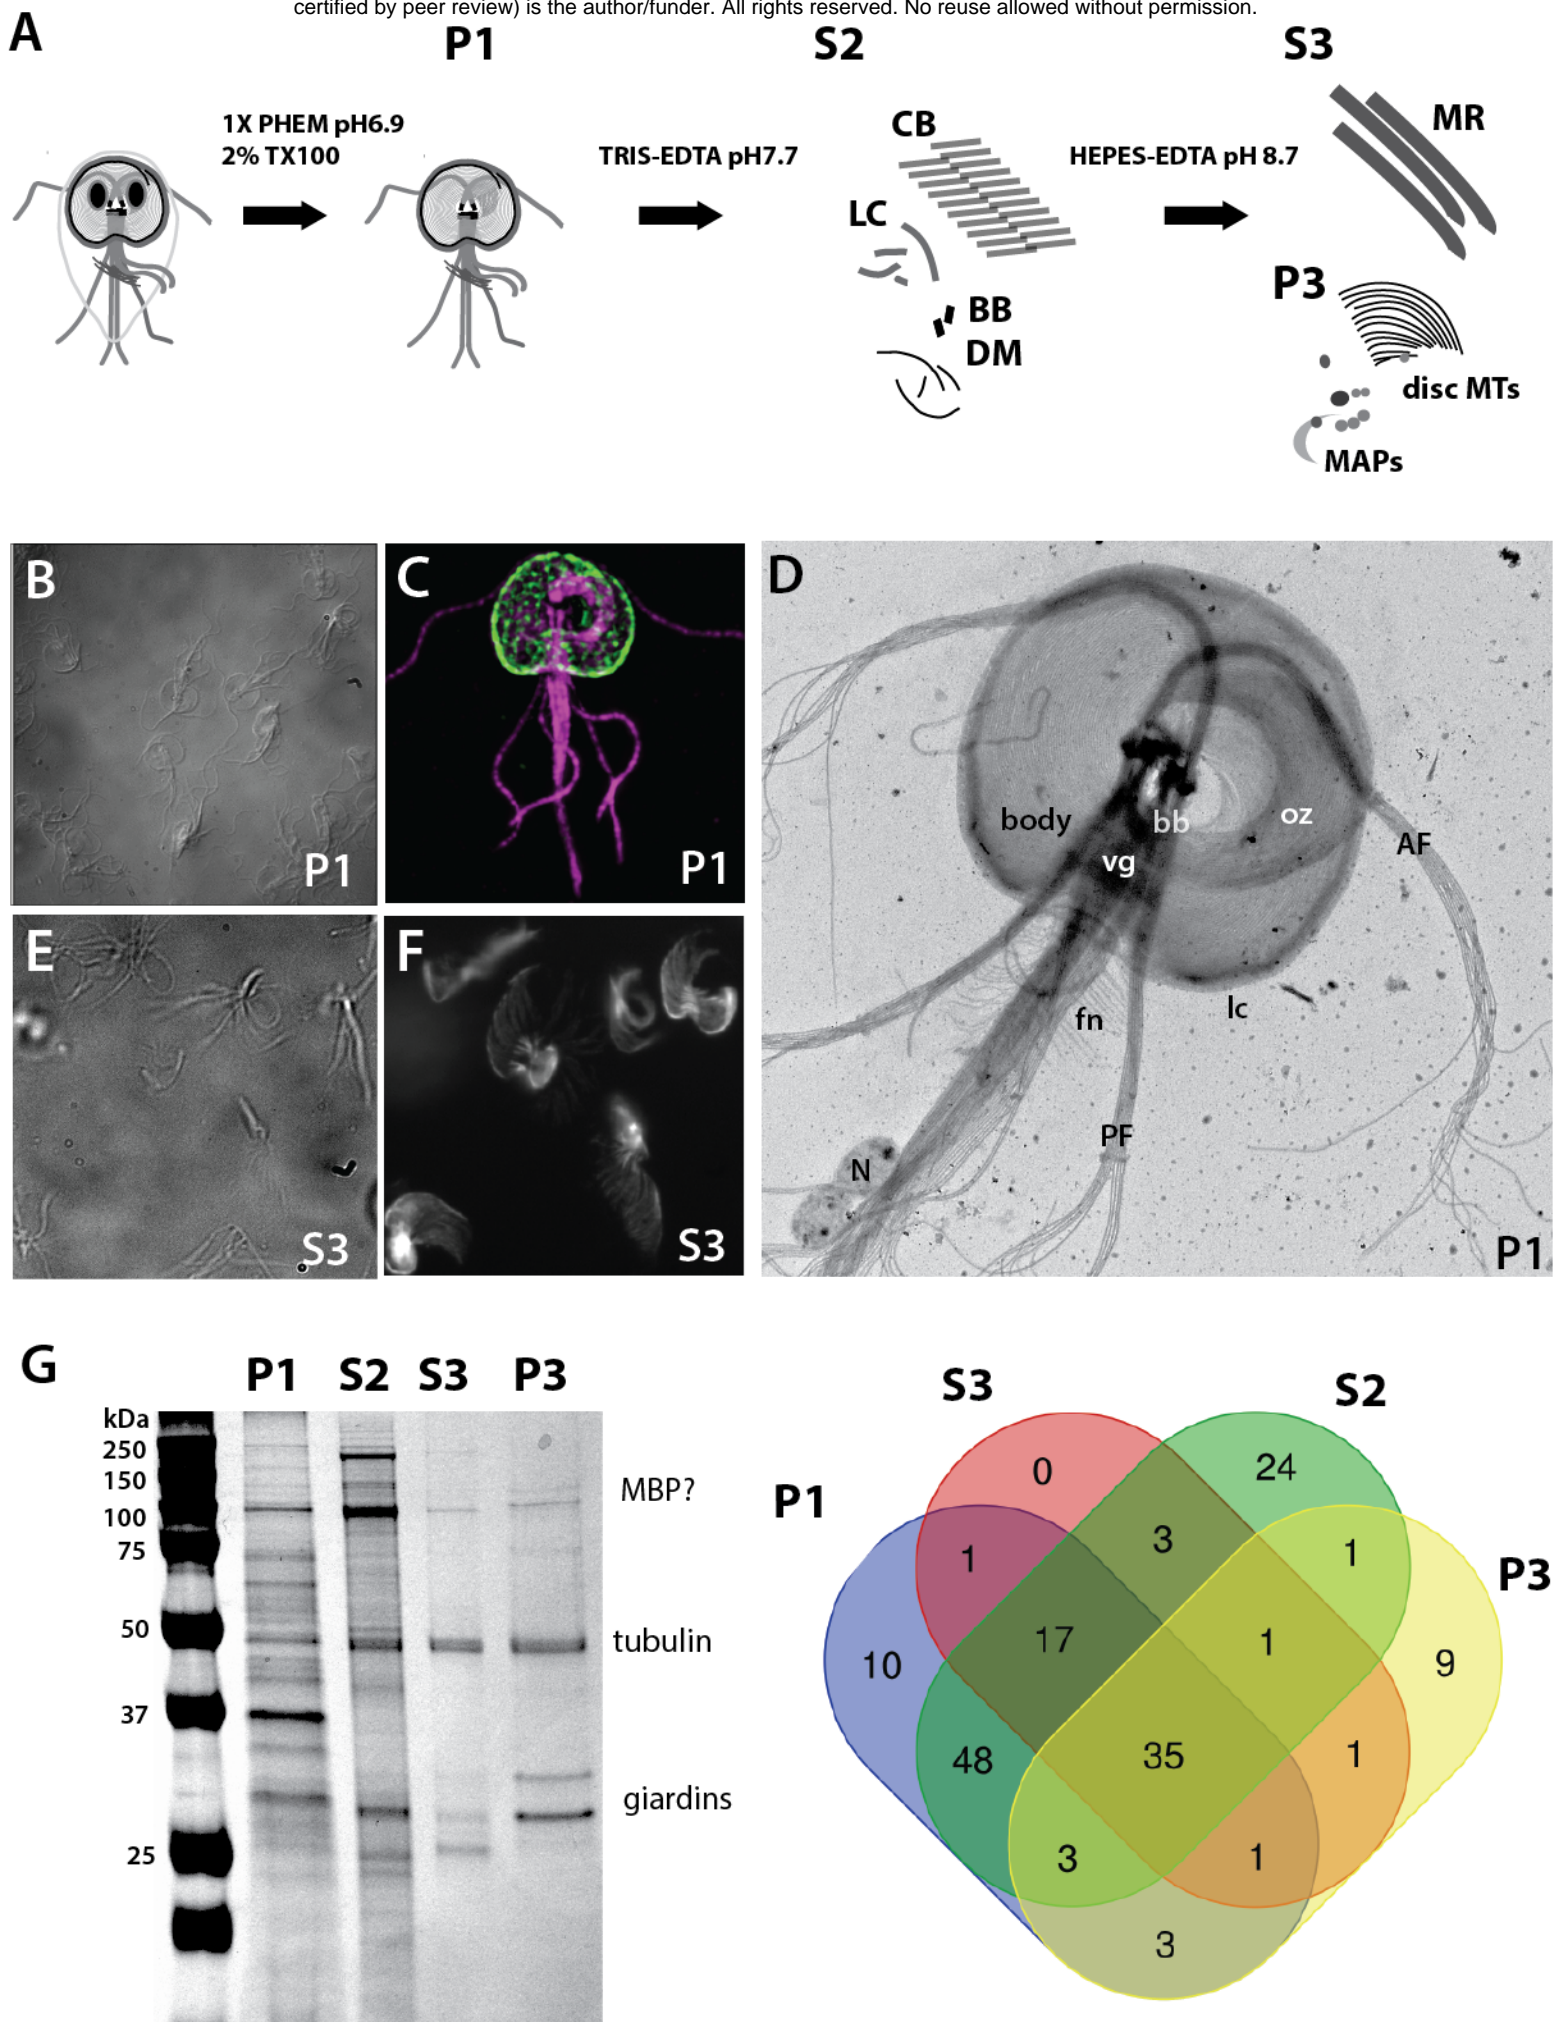

### flagella\*

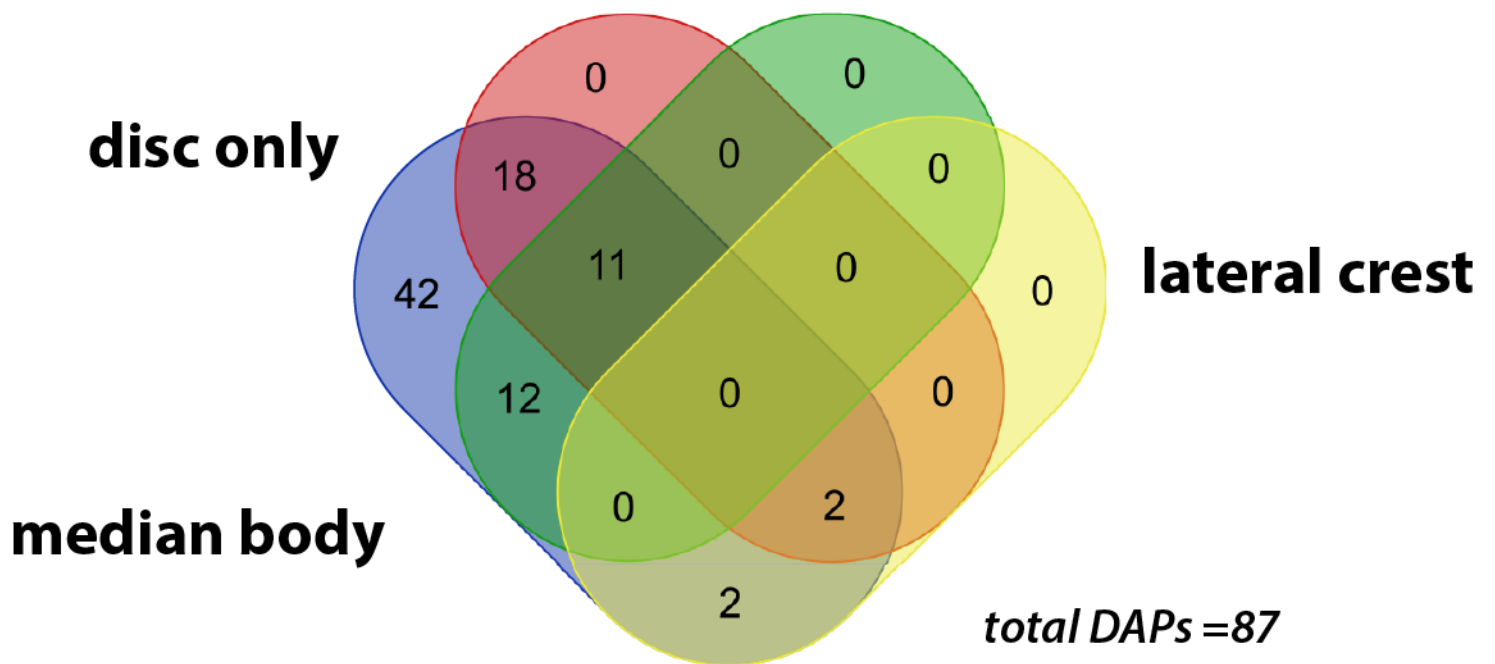

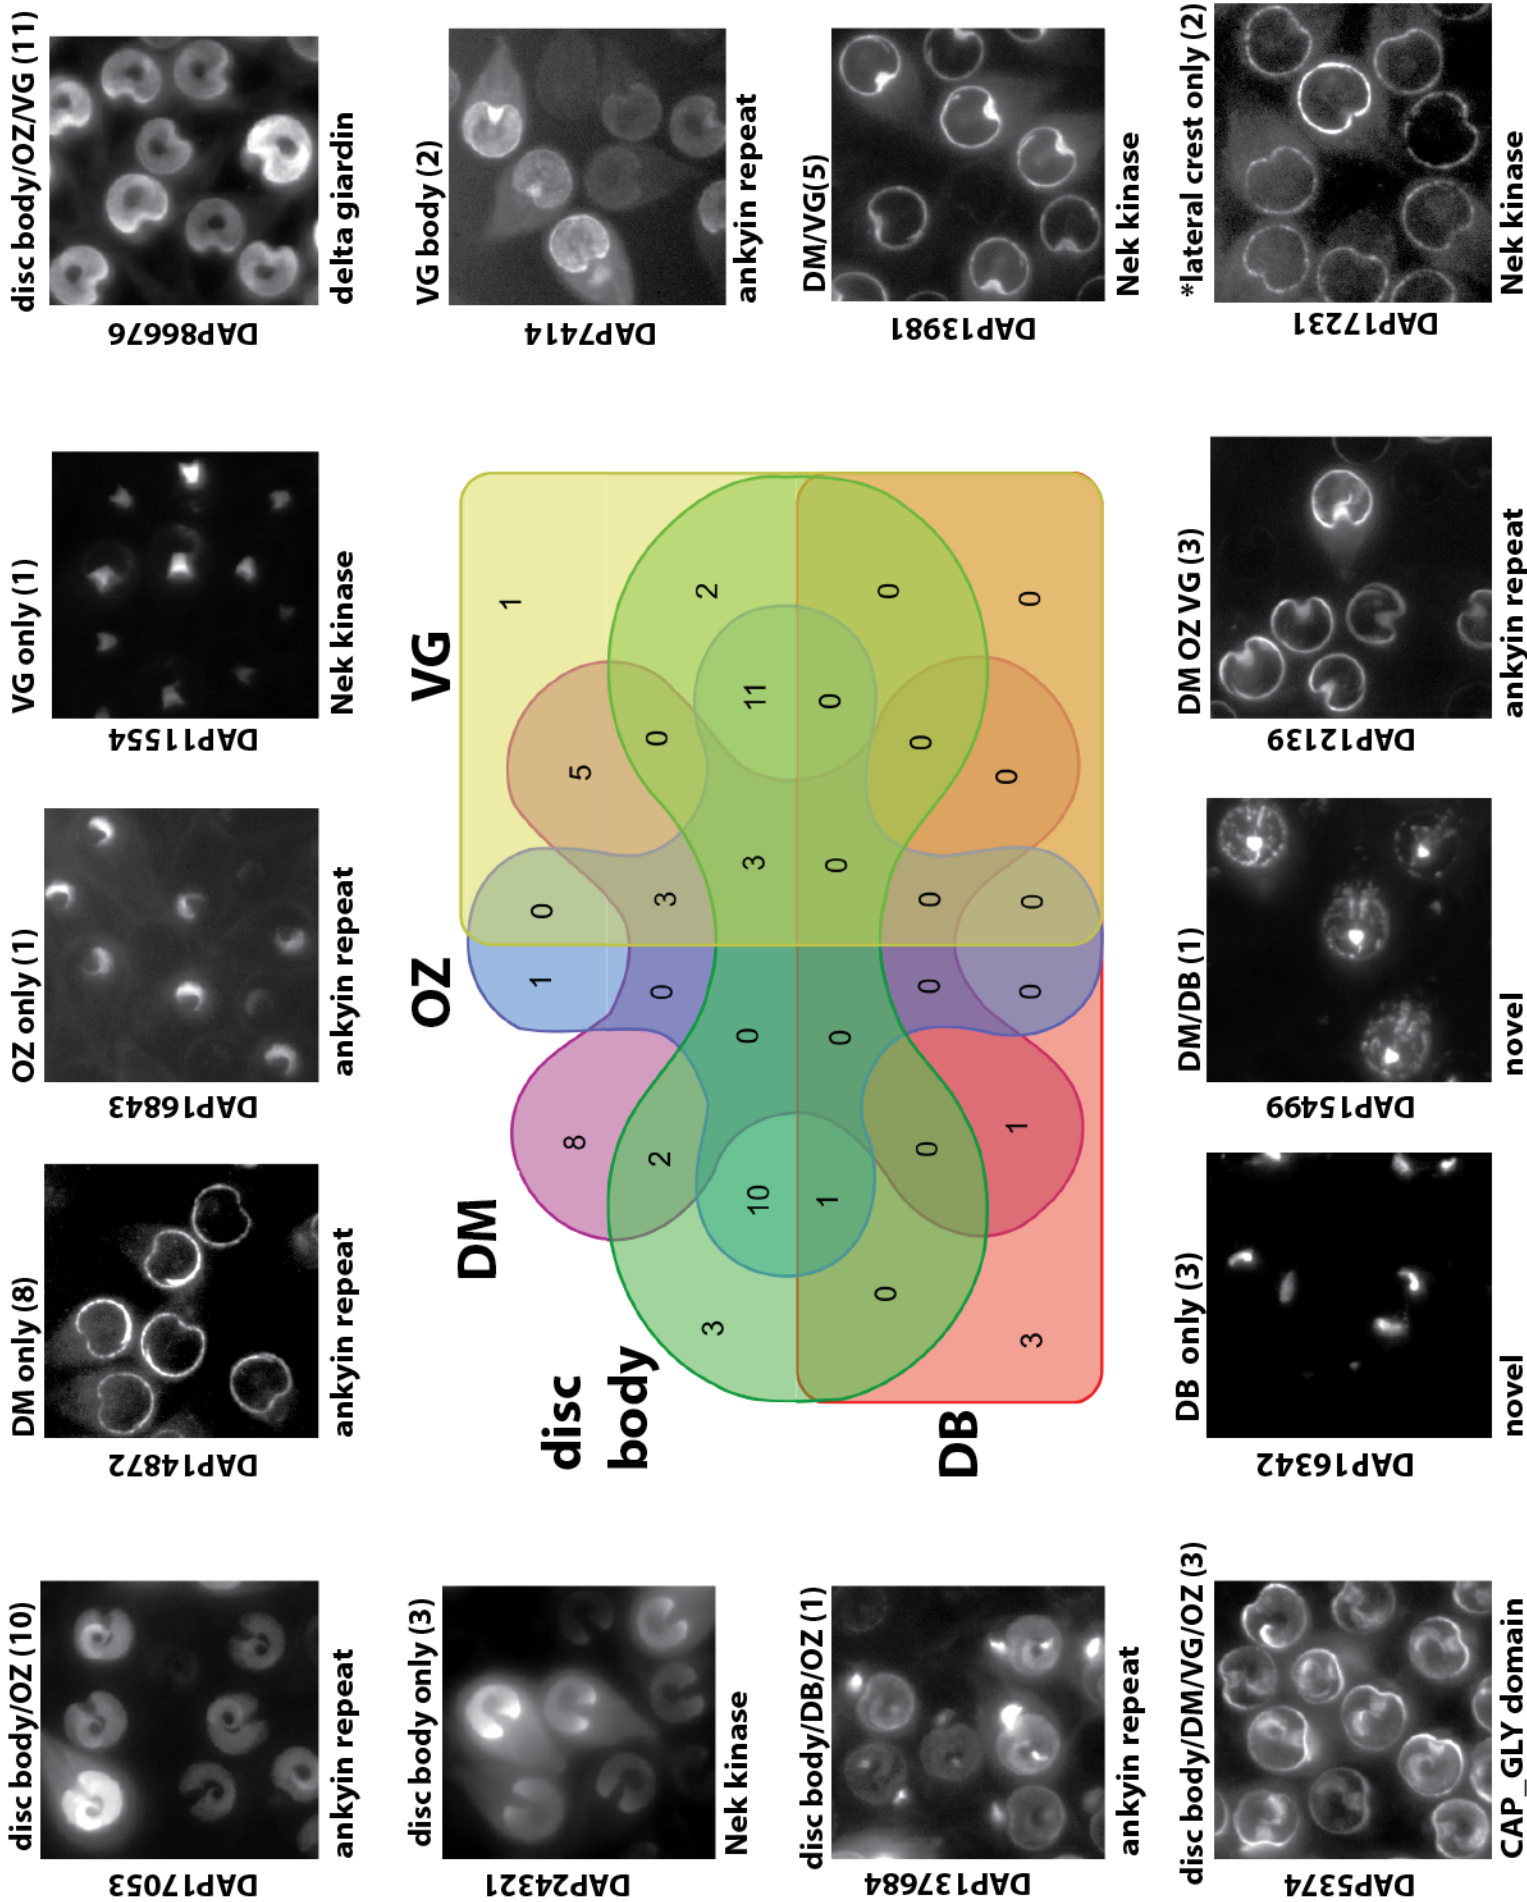

| <b>GiardiaDB</b> | <b>annotation</b>       | <b>MW (kDa)</b> | <b>PFAM</b>  | <b>P1K</b> | <b>P1M</b> | <b>MR1</b> | <b>MR3</b> | <b>CB1</b> |
|------------------|-------------------------|-----------------|--------------|------------|------------|------------|------------|------------|
| GL50803_4812     | beta giardin            | 31              | SF-assemblin | 191        | 44         | 511        | 92         | 242        |
| GL50803_16343    | median body protein     | 101             | none         | 70         | 31         | 268        | 58         | 195        |
| GL50803_17230    | gamma giardin           | 36              | none         | 105        | 12         | 232        | 38         | 83         |
| GL50803_86676    | delta-giardin           | 34              | SF-assemblin | 50         | 7          | 171        | 48         | 130        |
| GL50803_12139    | ankyrin repeat protein  | 76              | ankyrin      | 42         | 19         | 136        | 42         | 80         |
| GL50803_137716   | GASP-180 family protein | 175             | ankyrin      | 387        | 63         | 94         | 66         | 662        |
| GL50803_4410     | SALP-1                  |                 | SF assemblin | 24         | 1          | 67         | 34         | 55         |
| GL50803_4852     | hypothetical protein    | 49              | none         | 13         | 22         | 67         | 4          | 19         |
| GL50803_113622   | ankyrin repeat protein  | 164             | ankyrin      | 25         | 7          | 62         | 3          | 49         |
| GL50803_14859    | ankyrin repeat protein  | 103             | ankyrin      | 99         | 45         | 60         | 6          | 419        |
| GL50803_13475    | GASP-180 family protein | 236             | ankyrin      | 20         | 21         | 55         | 26         | 189        |
| GL50803_7444     | hypothetical protein    | 41              | none         | 31         | 16         | 55         | 12         | 79         |
| GL50803_10524    | hypothetical protein    | 27              | none         | 28         | 8          | 53         | 7          | 29         |
| GL50803_17551    | ankyrin repeat protein  | 119             | ankyrin      | 80         | 72         | 47         | 14         | 224        |
| GL50803_27925    | ankyrin repeat protein  | 88              | ankyrin      | 153        | 56         | 44         | 4          | 376        |
| GL50803_24537    | hypothetical protein    | 59              | none         | 17         | 11         | 31         | 21         | 106        |
| GL50803_9515     | ankyrin repeat protein  | 150             | ankyrin      | 32         | 37         | 31         | 20         | 227        |
| GL50803_5489     | Nek kinase GK271        | 61              | kinase       | 7          | 1          | 28         | 8          | 2          |
| GL50803_5188     | ankyrin repeat protein  | 57              | ankyrin      | 11         | 9          | 25         | 7          | 25         |
| GL50803_88369    | ankyrin repeat protein  | 92              | ankyrin      | 7          | 7          | 25         | 0          | 40         |
| GL50803_16532    | ankyrin repeat protein  | 93              | ankyrin      | 46         | 36         | 23         | 15         | 141        |
| GL50803_11165    | ankyrin repeat protein  | 82              | ankyrin      | 16         | 6          | 23         | 2          | 44         |
| GL50803_16844    | hypothetical protein    | 35              | none         | 29         | 9          | 23         | 0          | 3          |
| GL50803_15410    | Ser/Thr protein kinase  | 32              | ankyrin      | 46         | 11         | 20         | 12         | 70         |
| GL50803_5883     | hypothetical protein    | 63              | none         | 32         | 26         | 19         | 23         | 118        |
| GL50803_17468    | hypothetical protein    | 36              | none         | 10         | 10         | 19         | 4          | 13         |
| GL50803_10527    | hypothetical protein    | 35              | none         | 2          | 0          | 17         | 2          | 14         |
| GL50803_8726     | hypothetical protein    | 106             | none         | 8          | 19         | 15         | 26         | 142        |
| GL50803_17097    | ankyrin repeat protein  | 163             | ankyrin      | 0          | 0          | 15         |            | 66         |
| GL50803_15499    | hypothetical protein    | 49              | none         | 23         | 14         | 13         | 4          | 20         |
| GL50803_7268     | ankyrin repeat protein  | 126             | ankyrin      | 8          | 3          | 13         | 0          | 5          |
| GL50803_112557   | ankyrin repeat protein  | 89              | ankyrin      | 7          | 1          | 13         | 0          | 0          |

|                |                                 |     |               |     |    |    |     |    |
|----------------|---------------------------------|-----|---------------|-----|----|----|-----|----|
| GL50803_41512  | DUF1126 domain                  | 74  | DUF1126       | 20  | 3  | 11 | 0   | 0  |
| GL50803_15409  | Nek kinase GK175                | 57  | kinase        | 164 | 23 | 9  | 21  | 63 |
| GL50803_4239   | hypothetical protein            | 11  | none          | 4   | 0  | 8  | 5   | 34 |
| GL50803_17046  | ankyrin repeat protein          | 75  | ankyrin       | 18  | 14 | 8  | 4   | 28 |
| GL50803_16424  | Mlf1IP domain protein           | 30  | Mlf1IP        | 13  | 2  | 8  | 0   | 11 |
| GL50803_13584  | hypothetical protein            | 44  | none          | 48  | 41 | 7  | 10  | 88 |
| GL50803_16935  | hypothetical protein            | 94  | none          | 11  | 5  | 7  | 3   | 2  |
| GL50803_6709   | hypothetical protein            | 58  | none          | 1   | 4  | 7  | 0   | 0  |
| GL50803_9030   | ankyrin repeat protein          | 37  | ankyrin       | 48  | 35 | 6  | 6   | 92 |
| GL50803_9148   | SHIPPO repeat family protein    | 22  | SHIPPO-repeat | 7   | 20 | 6  | 2   | 13 |
| GL50803_16720  | radial spokehead family protein | 96  | rsp           | 13  | 0  | 5  | 2   | 41 |
| GL50803_14921  | hypothetical protein            | 55  | none          | 11  | 18 | 5  | 2   | 6  |
| GL50803_16996  | enkurin superfamily protein     | 46  | enkurin       | 8   | 1  | 5  | 0   | 7  |
| GL50803_16279  | Nek kinase GK256                | 75  | kinase        | 4   | 1  | 4  | 0   | 15 |
| GL50803_91354  | SHIPPO repeat family protein    | 63  | SHIPPO-repeat | 14  | 31 | 3  | 5   | 16 |
| GL50803_9848   | dynein light chain              | 10  | LC8           | 16  | 2  | 3  | 0   | 9  |
| GL50803_13372  | TPH domain protein              | 55  | TPH           | 6   | 2  | 3  | 0   | 6  |
| GL50803_11654  | alpha1-giardin                  | 34  | annexin       | 121 | 11 | 2  | 13  | 34 |
| GL50803_17585  | ankyrin repeat protein          | 77  | ankyrin       | 22  | 24 | 2  | 4   | 78 |
| GL50803_104685 | centrin                         | 20  | centrin       | 4   | 17 | 1  | 4   | 26 |
| GL50803_11554  | Nek kinase GK249                | 32  | kinase        | 7   | 0  | 1  | 2   | 21 |
| GL50803_16263  | conserved hypothetical protein  | 12  | none          | 2   | 6  | 1  | 0   | 18 |
| GL50803_7520   | hypothetical protein            | 54  | none          | 2   | 0  | 1  | 0   | 41 |
| GL50803_137684 | ankyrin repeat protein          |     | ankyrin       | 2   | 0  | 0  |     | 0  |
| GL50803_101291 | beta-tubulin 1                  | 50  | tubulin       | 503 | 42 | 0  | 120 | 0  |
| GL50803_103676 | alpha tubulin 1                 | 51  | tubulin       | 360 | 40 | 0  | 59  | 0  |
| GL50803_17249  | hypothetical protein            | 191 | none          | 81  | 34 | 0  | 24  | 6  |
| GL50803_41212  | ankyrin repeat protein          | 149 | ankyrin       | 90  | 33 | 0  | 23  | 25 |
| GL50803_15411  | Nek kinase GK292                | 78  | kinase        | 83  | 22 | 0  | 8   | 7  |
| GL50803_16745  | GASP-180 family protein         | 116 | ankyrin       | 117 | 54 | 0  | 7   | 21 |
| GL50803_7796   | alpha2-giardin                  | 34  | annexin       | 17  | 4  | 0  | 6   | 38 |
| GL50803_17153  | alpha11-giardin                 | 35  | annexin       | 58  | 6  | 0  | 6   | 7  |
| GL50803_10167  | hypothetical protein            | 133 | none          | 42  | 18 | 0  | 6   | 0  |



|                |                                 |     |                 |    |    |   |   |    |
|----------------|---------------------------------|-----|-----------------|----|----|---|---|----|
| GL50803_10808  | hypothetical protein            | 25  | none            | 9  | 0  | 0 | 6 | 0  |
| GL50803_100955 | mitotic spindle checkpoint MAD2 | 23  | horma domain    | 5  | 0  | 0 | 5 | 0  |
| GL50803_16521  | alpha SNAP                      | 32  | SNAP            | 2  | 4  | 0 | 5 | 21 |
| GL50803_17096  | ankyrin repeat protein          | 85  | ankyrin         | 5  | 5  | 0 | 2 | 44 |
| GL50803_94463  | hypothetical protein            | 53  | none            | 27 | 20 | 0 | 2 | 42 |
| GL50803_16648  | hypothetical protein            | 88  | none            | 22 | 5  | 0 | 2 | 0  |
| GL50803_14434  | ankyrin repeat protein          | 50  | ankyrin         | 16 | 11 | 0 | 2 | 0  |
| GL50803_8854   | hypothetical protein            | 70  | none            | 12 | 2  | 0 | 2 | 0  |
| GL50803_15035  | Nek kinase GK210                | 59  | kinase          | 10 | 1  | 0 | 2 | 0  |
| GL50803_3582   | hypothetical protein            | 40  | none            | 4  | 6  | 0 | 2 | 6  |
| GL50803_13651  | hypothetical protein            |     | none            | 17 | 7  | 0 | 0 | 0  |
| GL50803_10232  | hypothetical protein            |     | none            | 7  | 2  | 0 | 0 | 0  |
| GL50803_33866  | hypothetical protein            |     | none            | 2  | 0  | 0 | 0 | 0  |
| GL50803_16342  | hypothetical protein            |     | none            | 2  | 0  | 0 | 0 | 0  |
| GL50803_5374   | tubulin-specific chaperone B    |     | CAP-GLY         | 0  | 0  | 0 | 0 | 0  |
| GL50803_11683  | alpha3-giardin                  |     | annexin         | 0  | 0  | 0 | 0 | 0  |
| GL50803_3256   | epsin                           |     | ENTH            | 0  | 0  | 0 | 0 | 0  |
| GL50803_16272  | Nek kinase GK187                |     | kinase, ankyrin | 0  | 0  | 0 | 0 | 0  |
| GL50803_17412  | hypothetical protein            |     | none            | 0  | 0  | 0 | 0 | 0  |
| GL50803_17563  | ERK1 kinase                     |     | kinase          | 0  | 0  | 0 | 0 | 0  |
| GL50803_13981  | Nek kinase GK185                | 123 | kinase, ankyrin | 0  | 4  | 0 | 0 | 33 |
| GL50803_3957   | Nek kinase GK212                |     | kinase, ankyrin | 0  | 0  | 0 | 0 | 0  |
| GL50803_6751   | hypothetical protein            |     | none            | 0  | 0  | 0 | 0 | 0  |
| GL50803_24194  | ankyrin repeat protein          |     | ankyrin         | 3  | 0  | 0 | 0 | 0  |
| GL50803_14872  | ankyrin repeat protein          | 137 | ankyrin         | 1  | 2  | 0 | 0 | 14 |
| GL50803_103810 | ankyrin repeat protein          |     | ankyrin         | 0  | 0  | 0 | 0 | 0  |
| GL50803_15576  | ankyrin repeat protein          |     | ankyrin         | 0  | 0  | 0 | 0 | 0  |
| GL50803_10219  | ankyrin repeat protein          | 159 | ankyrin         | 8  | 2  | 0 | 0 | 14 |
| GL50803_14800  | ankyrin repeat protein          |     | ankyrin         | 0  | 3  | 0 | 0 | 0  |
| GL50803_8850   | ankyrin repeat protein          |     | ankyrin         | 0  | 0  | 0 | 0 | 0  |
| GL50803_5568   | DUF866 domain protein           |     | DUF866          | 0  | 0  | 0 | 0 | 0  |
| GL50803_10893  | Nek kinase GK193                |     | kinase          | 0  | 0  | 0 | 0 | 0  |
| GL50803_11775  | Nek kinase GK301                |     | kinase, ankyrin | 0  | 0  | 0 | 0 | 0  |

|                |                              |     |                                  |    |    |   |   |    |
|----------------|------------------------------|-----|----------------------------------|----|----|---|---|----|
| GL50803_103164 | SHIPPO repeat family protein |     | SHIPPO-repeat                    | 0  | 0  | 0 | 0 | 0  |
| GL50803_102455 | GiKIN6a                      |     | kinesin-6                        | 0  | 0  | 0 | 0 | 0  |
| GL50803_6171   | hypothetical protein         |     | none                             | 0  | 0  | 0 | 0 | 0  |
| GL50803_23492  | ankyrin repeat protein       |     | ankyrin                          | 5  | 13 | 0 | 0 | 0  |
| GL50803_17231  | Nek kinase GK186             | 111 | kinase, ankyrin                  | 3  | 16 | 0 | 0 | 38 |
| GL50803_15218  | WD-40 repeat protein         |     | WD40                             | 9  | 0  | 0 | 0 | 0  |
| GL50803_101326 | hypothetical protein         |     | none                             | 0  | 8  | 0 | 0 | 0  |
| GL50803_15918  | hypothetical protein         | 25  | none                             | 3  | 0  | 0 | 0 | 0  |
| GL50803_4977   | Nek kinase GK282             |     | kinase                           | 3  | 0  | 0 | 0 | 0  |
| GL50803_86815  | hypothetical protein         |     | none                             | 0  | 0  | 0 | 0 | 0  |
| GL50803_17053  | ankyrin repeat protein       | 14  | ankyrin                          | 12 | 6  | 0 | 0 | 31 |
| GL50803_13766  | ankyrin repeat protein       | 93  | ankyrin                          | 7  | 9  | 0 | 0 | 14 |
| GL50803_103807 | ankyrin repeat protein       | 103 | ankyrin                          | 0  | 0  | 0 | 0 | 50 |
| GL50803_13590  | ankyrin repeat protein       |     | ankyrin                          | 0  | 0  | 0 | 0 | 0  |
| GL50803_40016  | ankyrin repeat protein       |     | ankyrin                          | 0  | 0  | 0 | 0 | 0  |
| GL50803_4912   | Nek kinase GK265             |     | kinase                           | 0  | 0  | 0 | 0 | 0  |
| GL50803_3934   | hypothetical protein         |     | none                             | 0  | 0  | 0 | 0 | 0  |
| GL50803_15101  | alpha17-giardin              |     | annexin                          | 0  | 0  | 0 | 0 | 0  |
| GL50803_7797   | alpha5-giardin               |     | annexin                          | 0  | 0  | 0 | 0 | 0  |
| GL50803_5010   | Ser/Thr Phos PP2A            |     | calcineurin-like phosphoesterase | 0  | 0  | 0 | 0 | 0  |
| GL50803_92498  | Nek kinase GK270             |     | kinase                           | 0  | 0  | 0 | 0 | 0  |
| GL50803_14681  | ankyrin repeat protein       |     | ankyrin                          | 20 | 3  | 0 | 0 | 0  |
| GL50803_7414   | ankyrin repeat protein       |     | ankyrin                          | 0  | 0  | 0 | 0 | 0  |
| GL50803_5358   | aurora kinase                |     | kinase                           | 0  | 0  | 0 | 0 | 0  |
| GL50803_24321  | Nek kinase GK261             |     | kinase                           | 8  | 0  | 0 | 0 | 0  |
| GL50803_10181  | hypothetical protein         |     | none                             | 0  | 0  | 0 | 0 | 0  |
| GL50803_2556   | hypothetical protein         |     | none                             | 0  | 0  | 0 | 0 | 0  |
| GL50803_3760   | ankyrin repeat protein       |     | ankyrin                          | 0  | 0  | 0 | 0 | 0  |
| GL50803_17090  | SAM domain protein           |     | SAM                              | 38 | 11 | 0 | 0 | 0  |
| GL50803_16843  | ankyrin repeat protein       |     | ankyrin                          | 0  | 0  | 0 | 0 | 0  |
| GL50803_14551  | alpha6-giardin               | 33  | annexin                          | 66 | 0  | 0 | 0 | 0  |
| GL50803_10038  | alpha18-giardin              | 32  | annexin                          | 0  | 0  | 0 | 0 | 19 |
| GL50803_5375   | Nek kinase GK170             | 45  | kinase                           | 15 | 7  | 0 | 0 | 10 |

|                |                                |     |               |    |    |   |   |    |
|----------------|--------------------------------|-----|---------------|----|----|---|---|----|
| GL50803_16804  | dynein heavy chain             | 262 | DHC           | 10 | 1  | 0 | 0 | 7  |
| GL50803_33218  | dynein intermediate chain IC78 | 84  | DIC           | 9  | 4  | 0 | 0 | 19 |
| GL50803_17243  | OAD-beta dynein                | 163 | DHC           | 6  | 0  | 0 | 0 | 9  |
| GL50803_17265  | OAD-alpha dynein               | 302 | DHC           | 5  | 0  | 0 | 0 | 15 |
| GL50803_6939   | dynein intermediate chain IC70 | 70  | DIC           | 2  | 1  | 0 | 0 | 11 |
| GL50803_113677 | hypothetical protein           | 255 | none          | 97 | 35 | 0 | 0 | 18 |
| GL50803_115478 | hypothetical protein           | 80  | none          | 55 | 5  | 0 | 0 | 0  |
| GL50803_11390  | Nek kinase GK209               | 85  | kinase        | 36 | 7  | 0 | 0 | 0  |
| GL50803_8217   | uridine kinase                 | 66  | PRK           | 35 | 0  | 0 | 0 | 0  |
| GL50803_11118  | enolase                        | 48  | enolase       | 34 | 2  | 0 | 0 | 6  |
| GL50803_7031   | hypothetical protein           | 109 | none          | 26 | 13 | 0 | 0 | 0  |
| GL50803_93551  | metalloprotease                | 129 | M16C protease | 21 | 2  | 0 | 0 | 0  |
| GL50803_15953  | Nek kinase GK231               | 125 | kinase        | 20 | 0  | 0 | 0 | 39 |
| GL50803_9720   | ankyrin repeat protein         | 113 | ankyrin       | 19 | 3  | 0 | 0 | 28 |
| GL50803_9508   | metalloprotease                | 131 | insulinase    | 19 | 3  | 0 | 0 | 16 |
| GL50803_21444  | hypothetical protein           | 66  | none          | 18 | 14 | 0 | 0 | 34 |
| GL50803_14895  | hypothetical protein           | 72  | none          | 17 | 4  | 0 | 0 | 21 |
| GL50803_16926  | hypothetical protein           | 57  | none          | 15 | 7  | 0 | 0 | 0  |
| GL50803_103059 | dynein heavy chain             | 274 | DHC           | 15 | 4  | 0 | 0 | 29 |
| GL50803_16549  | uridine kinase                 | 77  | PRK           | 15 | 2  | 0 | 0 | 0  |
| GL50803_114462 | axonemal p66 (RSP6)            | 63  | ODA-DC 2      | 11 | 5  | 0 | 0 | 6  |
| GL50803_112112 | hypothetical protein           | 136 | none          | 11 | 3  | 0 | 0 | 40 |
| GL50803_7207   | hypothetical protein           | 120 | none          | 9  | 2  | 0 | 0 | 0  |
| GL50803_32999  | hypothetical protein           | 51  | none          | 8  | 1  | 0 | 0 | 0  |
| GL50803_102034 | Nek kinase GK295               | 108 | kinase        | 7  | 0  | 0 | 0 | 0  |
| GL50803_11164  | ankyrin repeat protein         | 79  | ankyrin       | 6  | 16 | 0 | 0 | 22 |
| GL50803_102023 | ankyrin repeat protein         | 92  | ankyrin       | 6  | 0  | 0 | 0 | 0  |
| GL50803_33660  | ankyrin repeat protein         | 104 | ankyrin       | 5  | 7  | 0 | 0 | 0  |
| GL50803_17568  | ankyrin repeat protein         | 60  | ankyrin       | 5  | 3  | 0 | 0 | 7  |
| GL50803_6081   | ankyrin repeat protein         | 132 | ankyrin       | 5  | 0  | 0 | 0 | 25 |
| GL50803_11720  | ankyrin repeat protein         | 48  | ankyrin       | 5  | 0  | 0 | 0 | 0  |
| GL50803_15446  | hypothetical protein           | 38  | none          | 5  | 0  | 0 | 0 | 0  |
| GL50803_95192  | ankyrin repeat protein         | 124 | ankyrin       | 4  | 2  | 0 | 0 | 0  |

|                |                                    |     |                 |   |    |   |   |    |
|----------------|------------------------------------|-----|-----------------|---|----|---|---|----|
| GL50803_26199  | Nek kinase GK262                   | 53  | kinase          | 4 | 1  | 0 | 0 | 0  |
| GL50803_93294  | ankyrin repeat protein             | 139 | ankyrin         | 3 | 5  | 0 | 0 | 0  |
| GL50803_15054  | kelch repeat protein               | 166 | kelch repeat    | 3 | 2  | 0 | 0 | 0  |
| GL50803_14742  | Nek kinase GK253                   | 33  | kinase          | 3 | 1  | 0 | 0 | 0  |
| GL50803_8174   | ankyrin repeat protein             | 94  | ankyrin         | 2 | 5  | 0 | 0 | 71 |
| GL50803_16998  | conserved hypothetical protein     | 69  | none            | 2 | 5  | 0 | 0 | 0  |
| GL50803_16543  | hypothetical protein               | 64  | none            | 2 | 3  | 0 | 0 | 5  |
| GL50803_13467  | hypothetical protein               | 35  | none            | 2 | 1  | 0 | 0 | 0  |
| GL50803_11604  | hypothetical protein               | 35  | none            | 2 | 0  | 0 | 0 | 0  |
| GL50803_12224  | hypothetical protein               | 35  | none            | 2 | 0  | 0 | 0 | 0  |
| GL50803_4624   | DUF4490 domain protein             | 15  | DUF4490         | 1 | 7  | 0 | 0 | 0  |
| GL50803_95787  | hypothetical protein               | 147 | none            | 1 | 4  | 0 | 0 | 18 |
| GL50803_13133  | hypothetical protein               | 60  | none            | 0 | 14 | 0 | 0 | 40 |
| GL50803_5333   | calmodulin                         | 17  | EF-hand         | 0 | 14 | 0 | 0 | 35 |
| GL50803_9861   | hypothetical protein               | 43  | none            | 0 | 2  | 0 | 0 | 15 |
| GL50803_3746   | hypothetical protein               | 119 | none            | 0 | 1  | 0 | 0 | 12 |
| GL50803_16332  | hypothetical protein               | 196 | none            | 0 | 0  | 0 | 0 | 17 |
| GL50803_86761  | hypothetical protein               | 79  | none            | 0 | 0  | 0 | 0 | 17 |
| GL50803_16833  | EGF-like domain containing protein | 65  | EGF-like domain | 0 | 0  | 0 | 0 | 16 |
| GL50803_14341  | hypothetical protein               | 28  | none            | 0 | 0  | 0 | 0 | 8  |
| GL50803_3762   | ankyrin repeat protein             | 82  | ankyrin         | 0 | 0  | 0 | 0 | 5  |
| GL50803_14345  | hypothetical protein               | 160 | none            | 0 | 0  | 0 | 0 | 0  |
| GL50803_13437  | ankyrin repeat protein             | 35  | ankyrin         | 0 | 0  | 0 | 0 | 0  |
| GL50803_15587  | ankyrin repeat protein             | 28  | ankyrin         | 0 | 0  | 0 | 0 | 0  |
| GL50803_16729  | hypothetical protein               | 41  | none            | 0 | 0  | 0 | 0 | 0  |
| GL50803_17375  | hypothetical protein               | 41  | none            | 0 | 0  | 0 | 0 | 0  |
| GL50803_29796  | hypothetical protein               | 41  | none            | 0 | 0  | 0 | 0 | 0  |
| GL50803_14583  | hypothetical protein               | 21  | none            | 0 | 0  | 0 | 0 | 0  |
| GL50803_14507  | hypothetical protein               | 43  | none            | 0 | 0  | 0 | 0 | 0  |
| GL50803_4692   | hypothetical protein               | 27  | none            | 0 | 0  | 0 | 0 | 0  |
| GL50803_15605  | hypothetical protein               | 43  | none            | 0 | 0  | 0 | 0 | 0  |
| GL50803_112079 | alpha-tubulin 2                    | 51  | tubulin         |   |    |   |   |    |

| CB3 | P3  | localization | EM    | body | DM | LC | OZ | VG | DB | MB | FL | cyFL | bb | REF        | other localization            | DAP |
|-----|-----|--------------|-------|------|----|----|----|----|----|----|----|------|----|------------|-------------------------------|-----|
| 153 | 239 | antibody     | MR    | disc |    |    | OZ | VG |    |    |    |      |    | [77]       |                               | DAP |
| 94  | 72  | C-term GFP   | MT/OZ | disc | DM |    | OZ | VG |    | MB |    |      |    | [7]        |                               | DAP |
| 69  | 124 | antibody     |       | disc |    |    | OZ | VG |    |    |    |      |    | [30]       |                               | DAP |
| 69  | 33  | C-term GFP   | MR    | disc |    |    | OZ | VG |    |    |    |      |    | this study | none                          | DAP |
| 46  | 21  | C-term GFP   |       |      | DM |    | OZ | VG |    |    |    |      |    | this study | none                          | DAP |
| 560 | 19  | C-term GFP   |       |      |    |    |    |    |    |    |    |      |    | this study | cytoplasm                     | CY  |
| 42  | 25  | C-term GFP   | MR    | disc |    |    | OZ | VG |    |    |    |      |    | this study | none                          | DAP |
| 10  | 13  | HA tag       |       | disc | DM |    |    |    |    |    |    |      |    | [76]       |                               | DAP |
| 26  | 10  | none         |       |      |    |    |    |    |    |    |    |      |    | this study |                               | nd  |
| 147 | 0   | C-term GFP   |       | disc |    |    | OZ |    |    |    |    |      |    | this study | no VG                         | DAP |
| 55  | 25  | none         |       |      |    |    |    |    |    |    |    |      |    | this study |                               | nd  |
| 28  | 29  | none         |       |      |    |    |    |    |    |    |    |      |    | this study |                               | nd  |
| 15  | 33  | C-term GFP   |       | disc |    |    | OZ |    |    |    |    |      |    | this study | no VG                         | DAP |
| 98  | 19  | C-term GFP   |       | disc |    |    | OZ |    |    |    |    |      |    | this study | no VG                         | DAP |
| 92  | 3   | none         |       |      |    |    |    |    |    |    |    |      |    | this study |                               | nd  |
| 30  | 7   | C-term GFP   |       | disc | DM |    | OZ |    |    | MB |    | cyFL |    | this study | cytoplasmic caudal axoneme    | DAP |
| 66  | 24  | C-term GFP   |       | disc |    |    | OZ |    |    | MB |    |      |    | this study | no VG?                        | DAP |
| 5   | 0   | C-term GFP   |       |      | DM |    |    | VG |    |    |    |      |    | this study | none                          | DAP |
| 22  | 3   | C-term GFP   |       | disc |    |    | OZ | VG |    | MB |    |      |    | this study |                               | DAP |
| 6   | 0   | none         |       |      |    |    |    |    |    |    |    |      |    | this study |                               | nd  |
| 38  | 25  | none         |       |      |    |    |    |    |    |    |    |      |    | this study |                               | nd  |
| 22  | 6   | none         |       |      |    |    |    |    |    |    |    |      |    | this study |                               | nd  |
| 9   | 25  | C-term GFP   |       |      |    |    |    |    |    |    |    |      |    | this study | no localization               | NO  |
| 37  | 7   | C-term GFP   |       |      | DM |    |    |    |    |    |    | cyFL | BB | this study |                               | DAP |
| 43  | 19  | C-term GFP   |       | disc |    |    | OZ |    | DB | MB |    |      |    | this study |                               | DAP |
| 5   | 19  | none         |       |      |    |    |    |    |    |    |    |      |    | this study |                               | nd  |
| 5   | 5   | none         |       |      |    |    |    |    |    |    |    |      |    | this study |                               | nd  |
| 34  | 14  | C-term GFP   |       | disc |    |    | OZ | VG |    | MB |    |      |    | this study |                               | DAP |
| 13  | 2   | C-term GFP   |       |      | DM |    |    |    |    | MB |    | cyFL |    | [7]        | cytoplasmic anterior axonemes | DAP |
| 14  | 36  | C-term GFP   |       |      | DM |    |    |    | DB |    |    |      |    | this study |                               | DAP |
| 7   | 5   | C-term GFP   |       | disc |    |    | OZ | VG |    |    |    |      |    | this study | none                          | DAP |
| 0   | 5   | C-term GFP   |       | disc |    |    |    | VG |    |    |    |      |    | this study | none                          | DAP |

|     |     |            |    |      |    |    |    |    |    |    |      |            |                               |                             |     |
|-----|-----|------------|----|------|----|----|----|----|----|----|------|------------|-------------------------------|-----------------------------|-----|
| 6   | 9   | C-term GFP |    |      | DM |    |    |    | MB | FL |      | this study | all flagella                  | DAP                         |     |
| 122 | 2   | C-term GFP |    |      |    |    |    |    |    |    |      | this study | plasma membrane               | PM                          |     |
| 7   | 0   | C-term GFP |    | disc |    | OZ | VG |    |    |    |      | this study | cytoplasm                     | DAP                         |     |
| 7   | 5   | none       |    |      |    |    |    |    |    |    |      | this study |                               | nd                          |     |
| 19  | 11  | C-term GFP |    |      | DM |    |    |    |    |    | BB   | [7]        | no ventral groove             | DAP                         |     |
| 68  | 0   | C-term GFP |    |      |    |    |    |    |    |    | cyFL | this study | all cytoplasmic axonemes      | FL                          |     |
| 5   | 21  | C-term GFP |    |      | DM |    |    |    | MB | FL |      | this study | all flagella                  | DAP                         |     |
| 0   | 5   | C-term GFP |    |      | DM |    |    |    | MB | FL |      | this study | all flagella                  | DAP                         |     |
| 113 | 0   | C-term GFP |    |      |    |    |    |    |    |    |      | this study | cytoplasm                     | CY                          |     |
| 5   | 8   | C-term GFP |    |      | DM |    |    |    | MB | FL |      | this study | all flagella                  | DAP                         |     |
| 8   | 2   | C-term GFP |    |      |    |    |    |    |    | FL |      | this study | all flagella                  | FL                          |     |
| 8   | 16  | none       |    |      |    |    |    |    |    |    |      | this study |                               | nd                          |     |
| 5   | 8   | C-term GFP |    |      |    |    |    |    | MB | FL |      | this study |                               | FL                          |     |
| 6   | 3   | AU1 tag    |    | disc |    |    |    |    |    |    |      | BB         | [75]                          | DAP                         |     |
| 11  | 20  | C-term GFP |    |      |    |    |    |    |    |    |      | this study | no localization               | NO                          |     |
| 17  | 2   | C-term GFP |    |      |    |    |    |    |    | FL |      | this study | all flagella                  | FL                          |     |
| 5   | 8   | none       |    |      |    |    |    |    |    |    |      | this study |                               | nd                          |     |
| 67  | 0   | AU1        |    |      |    |    |    |    |    |    |      | [34]       | plasma membrane               | PM                          |     |
| 18  | 0   | C-term GFP |    |      |    |    |    |    |    |    |      | this study | no localization               | NO                          |     |
| 8   | 2   | C-term GFP |    |      |    |    |    |    |    |    |      | BB         | this study                    | BB                          |     |
| 3   | 0   | C-term GFP |    |      |    |    | VG |    |    |    |      | this study | none                          | DAP                         |     |
| 11  | 0   | C-term GFP |    |      |    | OZ |    | DB |    |    | cyFL | [7]        | cytoplasmic caudal axonemes   | DAP                         |     |
| 9   | 0   | C-term GFP |    |      | DM |    |    |    | MB |    | cyFL | BB         | this study                    | caudal cytoplasmic axonemes | DAP |
| 0   | 0   | C-term GFP |    | disc | DM | OZ |    |    | MB |    | cyFL |            | this study                    | all cytoplasmic axonemes    | DAP |
| 235 | 179 | antibody   | MT | disc | DM | OZ | VG | DB | MB | FL | cyFL | [78]       |                               | MT                          |     |
| 122 | 75  | antibody   | MT | disc | DM | OZ | VG | DB | MB | FL | cyFL | [78]       |                               | MT                          |     |
| 151 | 0   | C-term GFP |    |      |    |    |    |    |    | FL |      | this study | plasma membrane, all flagella | FL                          |     |
| 182 | 0   | none       |    |      |    |    |    |    |    |    |      | this study |                               | nd                          |     |
| 44  | 0   | C-term GFP |    |      |    |    |    |    |    |    |      | this study | plasma membrane               | PM                          |     |
| 195 | 0   | none       |    |      |    |    |    |    |    |    |      | this study | no localization               | NO                          |     |
| 32  | 0   | C-term GFP |    | disc |    |    | VG |    |    | FL |      | [15]       | ventral flagella              | DAP                         |     |
| 28  | 0   | none       |    |      |    |    |    |    |    |    |      | [34]       | lethal?                       | nd                          |     |
| 71  | 0   | C-term GFP |    |      |    |    |    |    |    |    |      | this study | plasma membrane               | PM                          |     |

|    |    |            |      |    |    |    |       |         |                          |                                     |     |
|----|----|------------|------|----|----|----|-------|---------|--------------------------|-------------------------------------|-----|
| 8  | 20 | none       |      |    |    |    |       |         | this study               | no localization                     | NO  |
| 4  | 0  | HA tag     |      |    |    |    |       |         | <a href="#">25057014</a> |                                     | nd  |
| 2  | 0  | none       |      |    |    |    |       |         | this study               |                                     | nd  |
| 11 | 0  | C-term GFP |      | DM |    |    |       |         | BB [7]                   |                                     | DAP |
| 49 | 0  | C-term GFP |      |    |    |    |       |         | this study               | cytoplasm                           | CY  |
| 12 | 24 | none       |      |    |    |    |       |         | this study               |                                     | nd  |
| 21 | 0  | C-term GFP |      |    |    |    |       |         | this study               | plasma membrane                     | PM  |
| 6  | 0  | C-term GFP |      |    |    |    | FL    |         | this study               | marginal plates; ciliary pockets    | FL  |
| 6  | 0  | none       |      |    |    |    |       |         | this study               |                                     | nd  |
| 6  | 2  | C-term GFP |      |    |    |    |       | cyFL BB | this study               |                                     | FL  |
| 0  | 0  | C-term GFP |      |    |    |    | DB    |         | this study               | none                                | DAP |
| 0  | 0  | C-term GFP |      |    |    |    | DB MB |         | this study               | cytoplasm                           | DAP |
| 0  | 0  | C-term GFP |      |    |    |    | DB MB | cyFL    | this study               | all cytoplasmic axonemes            | DAP |
| 0  | 0  | C-term GFP |      |    |    |    | DB    |         | this study               | none                                | DAP |
| 0  | 0  | C-term GFP | disc | DM | OZ | VG |       |         | [7]                      | none                                | DAP |
| 0  | 0  | AU1 tag    | disc | DM |    | VG |       |         | [34]                     |                                     | DAP |
| 0  | 0  | HA tag     | disc | DM |    |    |       |         | [74]                     |                                     | DAP |
| 0  | 0  | C-term GFP |      | DM | OZ | VG | MB    |         | this study               |                                     | DAP |
| 0  | 0  | C-term GFP |      | DM | OZ | VG | MB    |         | this study               |                                     | DAP |
| 0  | 0  | antibody   |      | DM |    | VG |       |         | [55]                     |                                     | DAP |
| 9  | 0  | C-term GFP |      | DM |    | VG |       |         | [7]                      | none                                | DAP |
| 0  | 0  | C-term GFP |      | DM |    | VG |       |         | this study               | none                                | DAP |
| 0  | 0  | C-term GFP |      | DM |    | VG |       |         | this study               | none                                | DAP |
| 0  | 0  | C-term GFP |      | DM |    |    |       |         | [7]                      | none                                | DAP |
| 6  | 0  | C-term GFP |      | DM |    |    |       |         | [7]                      | none                                | DAP |
| 0  | 0  | C-term GFP |      | DM |    |    |       |         | [7]                      | bare area                           | DAP |
| 0  | 0  | C-term GFP |      | DM |    |    |       |         | [7]                      | bare area                           | DAP |
| 7  | 0  | C-term GFP |      | DM |    |    |       |         | this study               | no VG                               | DAP |
| 0  | 0  | C-term GFP |      | DM |    |    |       |         | this study               | marginal plates                     | DAP |
| 0  | 0  | C-term GFP |      | DM |    |    |       |         | this study               | none. no VG                         | DAP |
| 0  | 0  | C-term GFP |      | DM |    |    |       | cyFL BB | this study               | caudal cytoplasmic axonemes         | DAP |
| 0  | 0  | C-term GFP |      | DM |    |    |       | cyFL BB | this study               | all cytoplasmic axonemes, cytoplasm | DAP |
| 0  | 0  | C-term GFP |      | DM |    |    |       | cyFL BB | this study               | all cytoplasmic axonemes            | DAP |

|    |    |            |      |    |    |    |      |               |                                      |              |
|----|----|------------|------|----|----|----|------|---------------|--------------------------------------|--------------|
| 0  | 0  | C-term GFP |      | DM |    | MB | cyFL | this study    | all cytoplasmic axonemes             | DAP          |
| 0  | 0  | C-term GFP |      | DM |    |    | cyFL | this study    | cytoplasmic posteriolateral axonemes | DAP          |
| 0  | 0  | C-term GFP |      | DM |    |    |      | this study    | cytoplasm                            | DAP          |
| 0  | 0  | C-term GFP |      |    | LC |    |      | [7]           | none                                 | DAP          |
| 10 | 0  | C-term GFP |      |    | LC |    |      | [7]           | none                                 | DAP          |
| 0  | 0  | C-term GFP |      |    | LC |    | cyFL | this study    | all cytoplasmic axonemes, cytoplasm  | DAP          |
| 0  | 0  | C-term GFP |      |    | LC |    | cyFL | BB this study | all cytoplasmic axonemes, cytoplasm  | DAP          |
| 11 | 16 | C-term GFP | disc |    | OZ | VG |      | this study    | none                                 | DAP          |
| 0  | 0  | C-term GFP | disc |    | OZ | VG |      | this study    | none                                 | DAP          |
| 0  | 0  | C-term GFP | disc |    | OZ | VG | MB   | this study    | median body, cytoplasm               | DAP          |
| 12 | 0  | C-term GFP | disc |    | OZ |    |      | [7]           | none. no VG                          | DAP          |
| 5  | 0  | C-term GFP | disc |    | OZ |    |      | [7]           | no ventral groove                    | DAP          |
| 7  | 0  | C-term GFP | disc |    | OZ |    |      | [7]           | none                                 | DAP          |
| 0  | 0  | C-term GFP | disc |    | OZ |    | cyFL | this study    | cytoplasmic anterior axonemes        | DAP          |
| 0  | 0  | C-term GFP | disc |    | OZ |    | MB   | this study    |                                      | DAP          |
| 0  | 0  | C-term GFP | disc |    | OZ |    | MB   | this study    | no VG                                | DAP          |
| 0  | 0  | C-term GFP | disc |    | OZ |    | MB   | this study    | no VG                                | DAP          |
| 0  | 0  | AU1 tag    | disc |    |    | VG | FL   | [34]          | ventral flagella                     | DAP          |
| 0  | 0  | AU1 tag    | disc |    |    | VG | FL   | [34]          | ventral flagella                     | DAP          |
| 0  | 0  | antibody   | disc |    |    | VG |      | BB [73]       |                                      | DAP          |
| 0  | 0  | AU1 tag    | disc |    |    | VG | cyFL | BB [75]       | anterior axonemes                    | DAP          |
| 0  | 0  | C-term GFP | disc |    |    | VG | cyFL | BB this study | all cytoplasmic axonemes, no nuclei  | DAP          |
| 0  | 0  | C-term GFP | disc |    |    | VG |      | this study    | none                                 | DAP          |
| 0  | 0  | antibody   | disc |    |    |    |      | [53]          |                                      | DAP          |
| 0  | 0  | C-term GFP | disc |    |    |    |      | [7]           | none. no VG                          | DAP          |
| 0  | 0  | C-term GFP | disc |    |    |    | cyFL | this study    | all cytoplasmic axonemes             | DAP          |
| 0  | 0  | C-term GFP | disc |    |    |    | MB   | FL cyFL       | this study                           | all flagella |
| 0  | 0  | C-term GFP | disc |    |    |    |      | this study    | cytoplasm                            | DAP          |
| 0  | 0  | C-term GFP |      |    | OZ |    | cyFL | BB [7]        | snMTs?                               | DAP          |
| 0  | 0  | C-term GFP |      |    | OZ |    |      | this study    | none                                 | DAP          |
| 11 | 0  |            |      |    |    |    |      | [34]          | cytoplasm                            | CY           |
| 6  | 0  | none       |      |    |    |    |      | [34]          |                                      | nd           |
| 6  | 0  | none       |      |    |    |    |      | REF           |                                      | nd           |



|     |   |            |    |         |            |                 |    |
|-----|---|------------|----|---------|------------|-----------------|----|
| 10  | 0 | none       |    |         | REF        |                 | nd |
| 9   | 0 | none       |    |         | REF        |                 | nd |
| 7   | 0 | none       |    |         | REF        |                 | nd |
| 15  | 0 | none       |    |         | REF        |                 | nd |
| 5   | 0 | none       |    |         | REF        |                 | nd |
| 166 | 0 | none       |    |         | this study |                 | nd |
| 88  | 0 | none       |    |         | this study |                 | nd |
| 18  | 0 | C-term GFP |    |         | this study | plasma membrane | PM |
| 10  | 0 | none       |    |         | this study |                 | nd |
| 24  | 0 | none       |    |         | this study |                 | nd |
| 18  | 0 | none       |    |         | this study |                 | nd |
| 16  | 0 | none       |    |         | this study |                 | nd |
| 22  | 0 | none       |    |         | this study |                 | nd |
| 23  | 0 | none       |    |         | this study |                 | nd |
| 31  | 0 | none       |    |         | this study |                 | nd |
| 54  | 0 | none       |    |         | this study |                 | nd |
| 28  | 0 | none       |    |         | this study |                 | nd |
| 2   | 3 | none       |    |         | this study |                 | nd |
| 17  | 0 | none       |    |         | this study |                 | nd |
| 9   | 0 | none       |    |         | this study |                 | nd |
| 2   | 5 | C-term GFP | FL |         | this study | all flagella    | FL |
| 28  | 0 | none       |    |         | this study |                 | nd |
| 0   | 5 | none       |    |         | this study |                 | nd |
| 17  | 0 | none       |    |         | this study |                 | nd |
| 13  | 0 | none       |    |         | this study |                 | nd |
| 11  | 0 | none       |    |         | this study |                 | nd |
| 5   | 0 | C-term GFP |    | cyFL    | this study |                 | FL |
| 21  | 0 | C-term GFP |    |         | this study | plasma membrane | PM |
| 6   | 0 | none       |    |         | this study |                 | nd |
| 13  | 0 | none       |    |         | this study |                 | MT |
| 6   | 0 | C-term GFP |    |         | this study | plasma membrane | PM |
| 3   | 7 | C-term GFP | MB | cyFL BB | this study |                 | FL |
| 5   | 0 | none       |    |         | this study |                 | nd |
